# Supplementary material
Source: publisher figshare collection journal article supplement (https://frontiersin.figshare.com/ndownloader/files/34783018)

## Supplementary Data

### Novel $\beta$ -cyclodextrin-based heptavalent glycyrrhetic acid conjugates: Synthesis, characterization and anti-influenza activity

Shuobin Liang<sup>1†</sup>, Xinyuan Ma<sup>1†</sup>, Man Li<sup>1</sup>, Yanliang Yi<sup>1</sup>, Qianqian Gao<sup>1</sup>, Yongmin Zhang<sup>4</sup>, Lihe Zhang<sup>1</sup>, Demin Zhou<sup>1,2,3</sup>, Sulong Xiao<sup>1\*</sup>

<sup>1</sup> State Key Laboratory of Natural and Biomimetic Drugs, School of Pharmaceutical Sciences, Peking University, Beijing 100191, China

<sup>2</sup> Institute of Chemical Biology, Shenzhen Bay Laboratories, Shenzhen 518132, China

<sup>3</sup> Ningbo Institute of Marine Medicine, Peking University, Ningbo 315010, China

<sup>4</sup> Sorbonne Université, Institut Parisien de Chimie Moléculaire, CNRS UMR 8232, 4 place Jussieu, 75005 Paris, France

1. **Figure S1 and Figure S2.** FTIR spectra of compounds **2** and **11** S3
2. **Figure S3.** The *in vitro* cytotoxic screening of GA (**2**),  $\beta$ -CD (**8**) as well as their heptavalent  $\beta$ -CD-GA conjugates **21-28** and **33-38** S4
3. **Figure S4.** Compound **37** inhibited virus-induced CPE in MDCK cells. S4
4. **Table S1.** Binding kinetics of compounds **2**, **8** and their conjugate **37** to HA protein S5
5. Synthesis and structure characterization of the new compounds **21-28** and **33-38** S6
6. Selected NMR and MS spectra of conjugates **21-28** and **33-38** S15

| Spectra                                   | Page |
|-------------------------------------------|------|
| <sup>1</sup> H NMR of compound <b>21</b>  | S14  |
| <sup>13</sup> C NMR of compound <b>21</b> | S14  |
| HSQC of compound <b>21</b>                | S15  |
| MALDI-TOF of compound <b>21</b>           | S15  |
| <sup>1</sup> H NMR of compound <b>22</b>  | S16  |
| <sup>13</sup> C NMR of compound <b>22</b> | S16  |
| HSQC of compound <b>22</b>                | S17  |

|                                           |     |
|-------------------------------------------|-----|
| MALDI-TOF of compound <b>22</b>           | S17 |
| <sup>1</sup> H NMR of compound <b>23</b>  | S18 |
| <sup>13</sup> C NMR of compound <b>23</b> | S18 |
| HSQC of compound <b>23</b>                | S19 |
| MALDI-TOF of compound <b>23</b>           | S19 |
| <sup>1</sup> H NMR of compound <b>24</b>  | S20 |
| <sup>13</sup> C NMR of compound <b>24</b> | S20 |
| HSQC of compound <b>24</b>                | S21 |

|                                           |     |
|-------------------------------------------|-----|
| MALDI-TOF of compound <b>24</b>           | S21 |
| <sup>1</sup> H NMR of compound <b>25</b>  | S22 |
| <sup>13</sup> C NMR of compound <b>25</b> | S22 |
| HSQC of compound <b>25</b>                | S23 |
| MALDI-TOF of compound <b>25</b>           | S23 |
| <sup>1</sup> H NMR of compound <b>26</b>  | S24 |
| <sup>13</sup> C NMR of compound <b>26</b> | S24 |
| HSQC of compound <b>26</b>                | S25 |
| MALDI-TOF of compound <b>26</b>           | S25 |
| <sup>1</sup> H NMR of compound <b>27</b>  | S26 |
| <sup>13</sup> C NMR of compound <b>27</b> | S26 |
| HSQC of compound <b>27</b>                | S27 |
| MALDI-TOF of compound <b>27</b>           | S27 |
| <sup>1</sup> H NMR of compound <b>28</b>  | S28 |
| <sup>13</sup> C NMR of compound <b>28</b> | S28 |
| HSQC of compound <b>28</b>                | S29 |
| MALDI-TOF of compound <b>28</b>           | S29 |
| <sup>1</sup> H NMR of compound <b>33</b>  | S30 |
| <sup>13</sup> C NMR of compound <b>33</b> | S30 |
| HSQC of compound <b>33</b>                | S31 |
| MALDI-TOF of compound <b>33</b>           | S31 |
| <sup>1</sup> H NMR of compound <b>34</b>  | S32 |

|                                           |     |
|-------------------------------------------|-----|
| <sup>13</sup> C NMR of compound <b>34</b> | S32 |
| HSQC of compound <b>34</b>                | S33 |
| MALDI-TOF of compound <b>34</b>           | S33 |
| <sup>1</sup> H NMR of compound <b>35</b>  | S34 |
| <sup>13</sup> C NMR of compound <b>35</b> | S34 |
| HSQC of compound <b>35</b>                | S35 |
| MALDI-TOF of compound <b>35</b>           | S35 |
| <sup>1</sup> H NMR of compound <b>36</b>  | S36 |
| <sup>13</sup> C NMR of compound <b>36</b> | S36 |
| HSQC of compound <b>36</b>                | S37 |
| MALDI-TOF of compound <b>36</b>           | S37 |
| <sup>1</sup> H NMR of compound <b>37</b>  | S38 |
| <sup>13</sup> C NMR of compound <b>37</b> | S38 |
| HSQC of compound <b>37</b>                | S39 |
| MALDI-TOF of compound <b>37</b>           | S39 |
| <sup>1</sup> H NMR of compound <b>38</b>  | S40 |
| <sup>13</sup> C NMR of compound <b>38</b> | S40 |
| HSQC of compound <b>38</b>                | S41 |
| MALDI-TOF of compound <b>38</b>           | S41 |

1. **Figure S1 and Figure S2.** FTIR spectra of compounds **2** and **11**

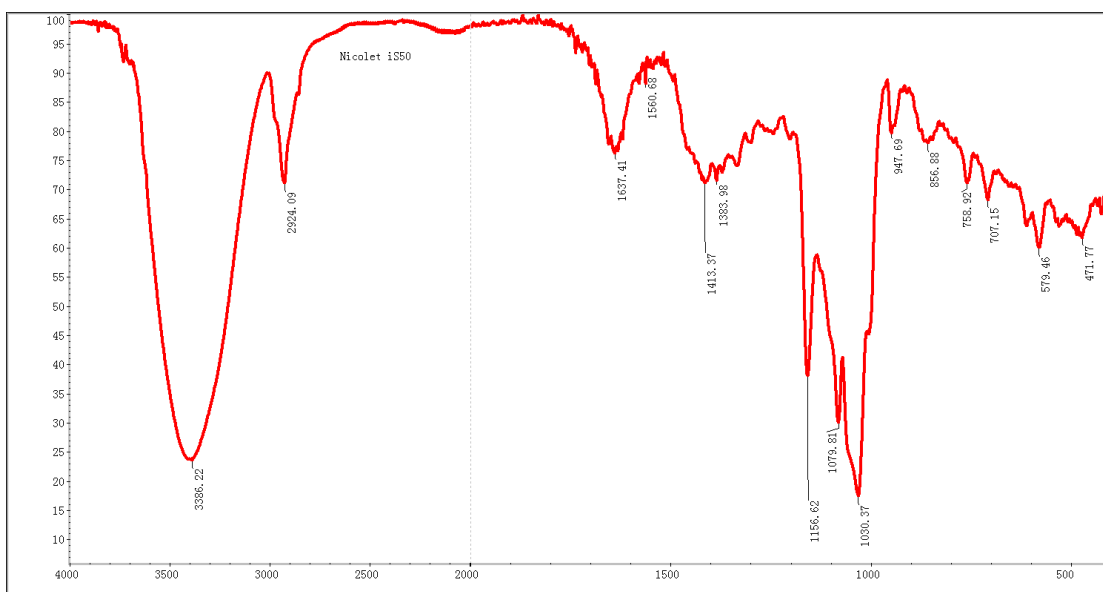

**Figure S1.** FTIR spectrum of compound **11**

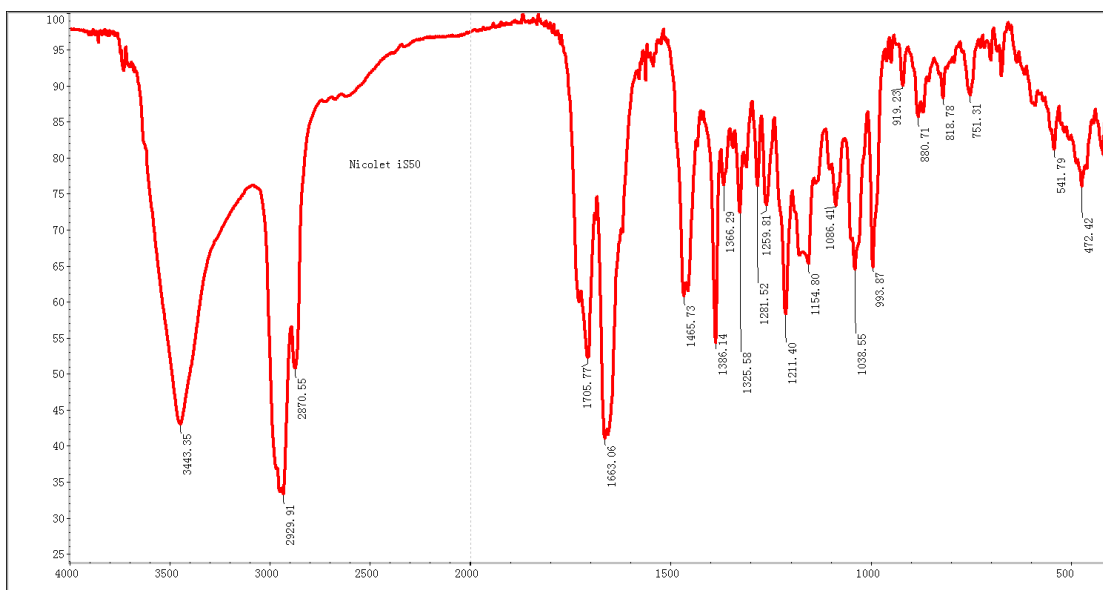

**Figure S2.** FTIR spectrum of compound **2**

2. **Figure S3.** The *in vitro* cytotoxic screening of GA (**2**),  $\beta$ -CD (**8**) as well as their heptavalent  $\beta$ -CD-GA conjugates **21-28** and **33-38**.

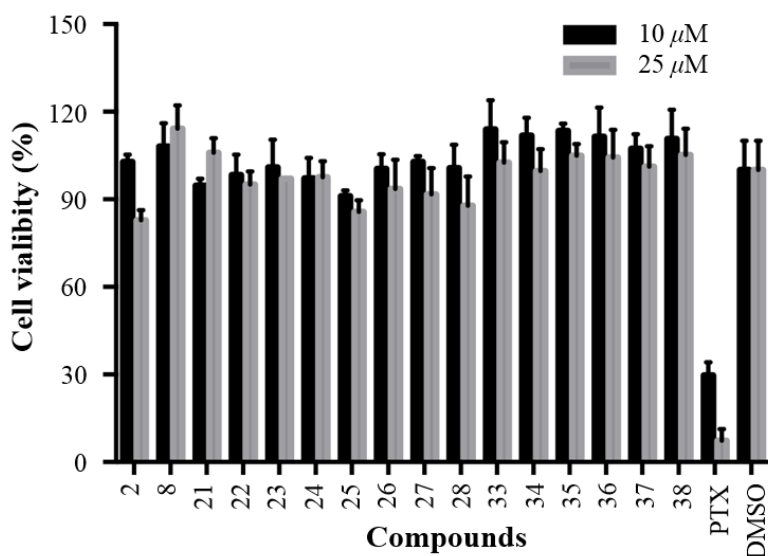

**Fig. S3.** The *in vitro* cytotoxic screening of GA (**2**),  $\beta$ -CD (**8**) as well as their heptavalent  $\beta$ -CD-GA conjugates **21-28** and **33-38** against MDCK cells using CellTiter-Glo<sup>®</sup> luminescent cell viability Assay. DMSO and PTX were used as negative and positive control, respectively. Error bars indicate standard deviations of triplicate experiments.

3. **Figure S4.** Compound **37** inhibited virus-induced CPE in MDCK cells.

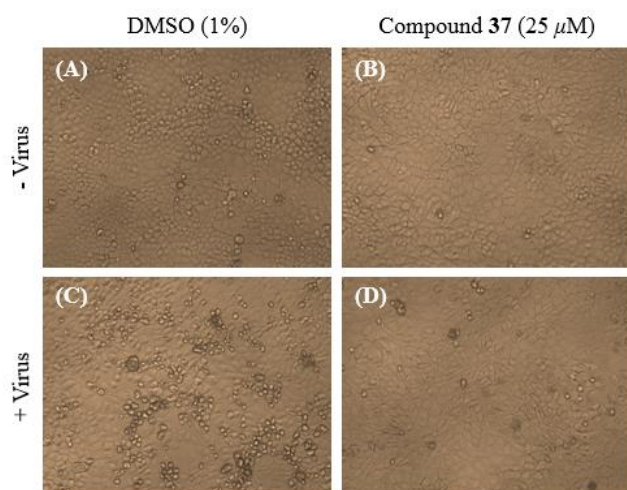

**Fig. S4.** Compound **37** inhibited virus-induced CPE in MDCK cells. Cells were seeded into 96-well plates, incubated overnight and infected with influenza virus (MOI = 0.1) suspended in DMEM supplemented with 1% FBS, 2  $\mu$ g/mL TPCK-treated trypsin, 25  $\mu$ M compound **37**, and a final DMSO concentration of 1% in each well. The CPE reduction was observed 48 h post-infection under a microscope. DMSO was used as a negative control.

4. **Table S1.** Binding kinetics of compounds **2**, **8** and their conjugate **37** to HA protein

| Compd     | $K_a$ ( $M^{-1} \text{ sec}^{-1}$ ) | $K_d$ ( $\text{sec}^{-1}$ ) | $K_D(M)$              |
|-----------|-------------------------------------|-----------------------------|-----------------------|
| <b>2</b>  | $1.98 \times 10^3$                  | $4.86 \times 10^{-1}$       | $2.45 \times 10^{-4}$ |
| <b>8</b>  | -                                   | -                           | -                     |
| <b>37</b> | $2.31 \times 10^4$                  | $1.19 \times 10^{-2}$       | $5.15 \times 10^{-7}$ |

## 5. Synthesis and structure characterization of the new compounds **21-29** and **33-38**

### 5.1 Synthesis of heptakis (2,3-di-O-acetyl-6-deoxy-6-(4-(((3 $\beta$ -hydroxyolean-11-oxo-12-en-30-oyl)-aminoethyl)oxymethyl)-1H-1,2,3- triazol-1-yl))- $\beta$ -CD (**21**)

Prepared from **11** and **17** according to general procedure A, the residue was purified by flash chromatography (eluent: CH<sub>2</sub>Cl<sub>2</sub>:MeOH = 15:1) to afford **21** as a white solid in 59% yield.  $R_f$  = 0.45 (eluent: CH<sub>2</sub>Cl<sub>2</sub>:MeOH = 8:1); <sup>1</sup>H NMR (600 MHz, CDCl<sub>3</sub>):  $\delta$  8.08 (s, 7H), 7.03 (br s, 7H), 5.63 (s, 7H), 5.43 (s, 14H), 4.76–4.46 (m, 12H), 3.61–3.46 (m, 10H), 3.03 (s, 7H), 2.72 (s, 7H), 2.29 (s, 7H), 2.07 (m, 7H), 2.03 (m, 28H), 2.00 (m, 21H), 1.98 (m, 7H) 1.82 (m, 14H), 1.74–1.70 (m, 14H), 1.62–1.57 (m, 14H), 1.45 (m, 7H), 1.41–1.40 (m, 14H), 1.37 (s, 21H, 7  $\times$  CH<sub>3</sub>), 1.32–1.30 (m, 14H), 1.18 (d,  $J$  = 11.8 Hz, 7H), 1.11 (s, 42H, 14  $\times$  CH<sub>3</sub>), 1.08 (s, 21H, 7  $\times$  CH<sub>3</sub>), 1.01–0.99 (m, 7H), 0.96 (s, 21H, 7  $\times$  CH<sub>3</sub>), 0.78 (s, 42H, 14  $\times$  CH<sub>3</sub>), 0.77 (m, 7H), 0.58 (d, 7H,  $J$  = 14.2 Hz); <sup>13</sup>C NMR (150 MHz, CDCl<sub>3</sub>):  $\delta$  199.84, 175.82, 170.39, 169.15, 144.17, 127.75, 126.67, 96.90, 78.86, 77.18, 70.59, 70.05, 69.25, 64.24, 61.91, 55.37, 50.66, 48.49, 45.43, 43.35, 43.15, 41.63, 40.19, 39.20, 37.44, 37.05, 32.72, 31.81, 31.33, 28.95, 28.58, 28.30, 27.26, 26.58, 26.32, 23.39, 20.74, 18.70, 17.43, 16.56, 15.63; MALDI-TOF MS  $m/z$ : 5784.8 [M+Na]<sup>+</sup>.

### 5.2 Synthesis of heptakis (2,3-di-O-acetyl-6-deoxy-6-(4-(((3 $\beta$ -hydroxyolean-11-oxo-12-en-30-oyl)-aminoethyl)oxyethyl)oxymethyl)-1H-1,2,3- triazol-1-yl))- $\beta$ -CD (**22**)

Prepared from **11** and **18** according to general procedure A, the residue was purified by flash chromatography (eluent: CH<sub>2</sub>Cl<sub>2</sub>:MeOH = 15:1) to afford **22** as a white solid in 88% yield.  $R_f$  = 0.35 (eluent: CH<sub>2</sub>Cl<sub>2</sub>:MeOH = 10:1); <sup>1</sup>H NMR (600 MHz, CDCl<sub>3</sub>):  $\delta$  7.83 (s, 7H), 6.68 (s, 7H), 5.64 (s, 7H), 5.47 (s, 7H), 5.41 (t, 7H,  $J$  = 8.9 Hz), 4.85 (s, 7H), 4.80 (s, 7H), 4.71 (d, 7H,  $J$  = 7.7 Hz), 4.53 (s, 7H), 3.62–3.46 (m, 56H), 3.29 (s, 7H), 3.14 (dd, 7H,  $J$  = 11.2, 4.1 Hz), 2.71 (td, 7H,  $J$  = 13.0, 2.7 Hz), 2.31 (s, 7H), 2.12 (br d, 7H,  $J$  = 13.8 Hz), 2.04 (m, 7H), 2.03, 2.01 (s, each 21H, 2  $\times$  COCH<sub>3</sub>), 1.96 (br d, 7H,  $J$  = 11.9 Hz), 1.83–1.81 (m, 14H), 1.70 (t, 7H,  $J$  = 13.6 Hz), 1.63–1.57 (m, 14H), 1.45–1.33 (m, 35H), 1.36 (s, 21H, CH<sub>3</sub>), 1.28 (dt, 7H,  $J$  = 13.7, 2.3 Hz), 1.17 (br d, 7H,  $J$  = 12.4 Hz), 1.10 (2  $\times$  s, 63H, 21  $\times$  CH<sub>3</sub>), 1.00 (br d, 7H,  $J$  = 10.6 Hz), 0.98 (s, 21H, 7  $\times$  CH<sub>3</sub>), 0.87 (t, 7H,  $J$  = 12.9 Hz), 0.78 (s, 42H, 14  $\times$  CH<sub>3</sub>), 0.64 (d, 7H,  $J$  = 11.6 Hz); <sup>13</sup>C NMR (150 MHz, CDCl<sub>3</sub>):  $\delta$  199.86, 175.85, 170.35, 169.54, 169.26, 144.59, 128.18, 125.86, 96.50, 78.69, 76.82, 70.47, 70.11, 70.02, 69.91, 69.82, 69.64, 64.24, 61.83, 55.10, 50.01, 48.18, 45.40, 43.48, 43.14, 41.64, 39.63, 39.17, 39.05, 37.46, 37.05, 32.72, 31.83, 31.35, 29.33, 28.49, 28.22, 27.14, 26.53, 26.35, 23.33,

20.75, 20.71, 18.66, 17.44, 16.48, 15.62; MALDI-TOF MS  $m/z$ : 6093.1  $[M+Na]^+$ .

*5.3 Synthesis of heptakis (2,3-di-O-acetyl-6-deoxy-6-(4-(((3 $\beta$ -hydroxy-11-oxo-olean-12-en-30-oyl)-amino)-3,6,9,12-tetraoxatridecan-13-yl)-1H-1,2,3-triazol-1-yl))- $\beta$ -CD (23)*

Prepared from **11** and **19** according to general procedure A, the residue was purified by flash chromatography (eluent:  $CH_2Cl_2$ :MeOH = 10:1) to afford **23** as a white solid in 54% yield.  $R_f$  = 0.15 (eluent:  $CH_2Cl_2$ :MeOH = 10:1);  $^1H$  NMR (600 MHz,  $CDCl_3$ ):  $\delta$  7.76 (s, 7H), 6.31 (br s, 7H), 5.64 (s, 7H), 5.49 (s, 7H), 5.34 (t, 7H,  $J$  = 8.7 Hz), 4.85 (d, 7H,  $J$  = 13.0 Hz), 4.75–4.71 (m, 14H), 4.53 (t, 14H,  $J$  = 12.8 Hz), 4.47 (d, 7H,  $J$  = 8.1 Hz), 3.63–3.49 (m, 112H), 3.40–3.36 (m, 7H), 3.19 (dd, 7H,  $J$  = 11.3, 4.6 Hz), 2.74 (td, 7H,  $J$  = 13.5, 3.3 Hz), 2.31 (s, 7H), 2.14–2.13 (m, 7H), 2.04 (s, 21H), 2.03 (m, 7H), 2.00 (s, 27H), 1.93 (d, 7H,  $J$  = 11.3 Hz), 1.82 (dt, 7H,  $J$  = 13.6, 4.2 Hz), 1.78 (d, 14H,  $J$  = 14.3 Hz), 1.71 (d, 7H,  $J$  = 13.7 Hz), 1.68–1.57 (m, 28H), 1.45–1.30 (m, 35H), 1.36 (s, 21H,  $7 \times CH_3$ ), 1.18 (d, 7H,  $J$  = 12.7 Hz), 1.11 (s, 63H,  $21 \times CH_3$ ), 1.01 (d, 7H,  $J$  = 12.8 Hz), 0.98 (s, 21H,  $7 \times CH_3$ ), 0.93 (dt, 7H,  $J$  = 12.9, 2.9 Hz), 0.79, 0.78 (s, each 21H,  $14 \times CH_3$ ), 0.67 (d, 7H,  $J$  = 11.5 Hz);  $^{13}C$  NMR (150 MHz,  $CDCl_3$ ):  $\delta$  199.82, 175.74, 170.33, 169.33, 169.14, 144.78, 128.35, 125.62, 96.29, 78.61, 76.51, 70.67, 70.45, 70.39, 70.35, 70.16, 70.00, 69.88, 69.81, 69.64, 64.38, 61.81, 54.97, 49.97, 48.10, 45.34, 43.53, 43.16, 41.81, 39.26, 39.10, 39.09, 37.46, 37.03, 32.74, 31.85, 31.42, 29.42, 28.51, 28.13, 27.24, 26.48, 26.39, 23.37, 20.72, 20.68, 18.65, 17.45, 16.34, 15.61; MALDI-TOF MS  $m/z$ : 6709.6  $[M+Na]^+$ .

*5.4 Synthesis of Heptakis (2,3-di-O-acetyl-6-deoxy-6-(4-(((3 $\beta$ -hydroxy-11-oxo-olean-12-en-30-oyl)-amino)-3,6,9,12,15,18-hexaoxonadecan-19-yl)-1H-1,2,3-triazol-1-yl))- $\beta$ -CD (24)*

Prepared from **11** and **20** according to general procedure A, the residue was purified by flash chromatography (eluent:  $CH_2Cl_2$ :MeOH = 10:1) to afford **24** as a white solid in 62% yield.  $R_f$  = 0.20 (eluent:  $CH_2Cl_2$ :MeOH = 8:1);  $^1H$  NMR (400 MHz,  $CDCl_3$ ):  $\delta$  7.78 (s, 7H), 6.63 (s, 7H), 5.65 (s, 7H), 5.49 (s, 7H), 5.34 (s, 7H), 4.84 (s, 7H), 4.73–4.71 (m, 14H), 4.55 (s, 14H), 4.48 (s, 7H), 3.62–3.47 (m, 168H), 3.43–3.39 (m, 7H), 3.14 (dd, 7H,  $J$  = 11.0, 5.0 Hz), 2.75 (br d, 7H,  $J$  = 13.0 Hz), 2.32 (s, 7H), 2.15 (d, 7H,  $J$  = 12.2 Hz), 2.05 (s, 21H,  $7 \times COCH_3$ ), 2.03 (m, 7H), 2.00 (s, 21H,  $7 \times COCH_3$ ), 1.94 (d, 7H,  $J$  = 11.8 Hz), 1.85–1.57 (m, 49H), 1.46–1.31 (m, 35H), 1.37 (s, 21H,  $7 \times CH_3$ ), 1.18 (d, 7H,  $J$  = 13.9 Hz), 1.11 (s, 63H,  $21 \times CH_3$ ), 1.02 (m, 7H), 0.99 (s, 21H,  $7 \times CH_3$ ), 0.94 (m, 7H), 0.79 (s, 42H,  $21 \times CH_3$ ), 0.68 (d, 7H,  $J$  = 11.8 Hz);  $^{13}C$  NMR (100 MHz,  $CDCl_3$ ):  $\delta$  199.91, 175.81, 170.35, 169.37, 169.19, 144.75, 128.37, 125.67, 96.33, 78.62, 76.40, 70.63, 70.57,

70.40, 70.13, 69.78, 69.76, 69.66, 69.59, 64.35, 61.80, 54.94, 49.98, 48.06, 45.33, 43.54, 43.15, 41.80, 39.21, 39.11, 39.09, 37.46, 37.02, 32.73, 31.84, 31.41, 29.6, 28.53, 28.11, 27.24, 26.46, 26.38, 23.37, 20.74, 20.70, 18.64, 17.45, 16.35, 15.61; MALDI-TOF MS  $m/z$ : 7326.5  $[M+Na]^+$ .

*5.5 Synthesis of heptakis (6-deoxy-6-(4-(((3 $\beta$ -hydroxyolean-11-oxo-12-en-30-oyl)-aminoethyl)oxymethyl)-1H-1,2,3-triazol-1-yl))- $\beta$ -CD (25)*

Prepared from **21** according to general procedure B, the residue was purified by RP flash chromatography (eluent: methanol) to afford **25** as a white solid in 73% yield.  $^1H$  NMR (600 MHz,  $CD_3OD:CDCl_3 = 2:1$ ):  $\delta$  7.96 (s, 7H), 5.62 (s, 7H), 5.12 (d, 7H,  $J = 2.5$  Hz), 4.55–4.47 (m, 21H), 4.38 (dd, 7H,  $J = 8.4, 5.5$  Hz), 4.16 (br s, 7H), 3.87 (t, 7H,  $J = 9.2$  Hz), 3.53–3.52 (m, 14H), 3.47–3.41 (m, 14H), 3.30 (m, 7H, overlap with  $CD_3OD$ ), 3.28 (dd, 7H,  $J = 18.3, 9.3$  Hz), 3.16 (dd, 7H,  $J = 11.4, 4.4$  Hz), 2.70 (d, 7H,  $J = 12.9$  Hz), 2.38 (s, 7H), 2.13–2.07 (m, 14H), 1.94 (d, 7H,  $J = 5.0$  Hz), 1.89 (d, 7H,  $J = 13.0$  Hz), 1.83 (t, 7H,  $J = 12.3$  Hz), 1.70–1.64 (m, 21H), 1.61 (d, 7H,  $J = 12.8$  Hz), 1.53–1.52 (m, 7H), 1.43–1.36 (m, 35H), 1.39 (s, 21H,  $7 \times CH_3$ ), 1.21 (d, 7H,  $J = 12.8$  Hz), 1.11, 1.10, 1.09 (s, each 21H,  $21 \times CH_3$ ), 1.02 (d, 7H,  $J = 12.3$  Hz), 0.98 (s, 21H,  $7 \times CH_3$ ), 0.97 (m, 7H), 0.78, 0.77 (s, each 21H,  $14 \times CH_3$ ), 0.71 (d, 7H,  $J = 11.5$  Hz);  $^{13}C$  NMR (150 MHz,  $CD_3OD:CDCl_3 = 2:1$ ):  $\delta$  201.86, 178.18, 171.77, 145.13, 130.54, 128.83, 126.98, 103.09, 83.81, 79.05, 73.67, 73.18, 71.30, 70.01, 64.25, 62.79, 55.86, 51.48, 49.20, 46.38, 44.45, 44.21, 42.25, 40.21, 39.94, 39.78, 38.41, 37.96, 33.54, 32.63, 31.83, 29.65, 29.30, 28.58, 27.47, 27.29, 27.15, 23.88, 19.33, 18.29, 16.98, 16.24; MALDI-TOF MS  $m/z$ : 5195.4  $[M+Na]^+$ , 5210.9  $[M+K]^+$ .

*5.6 Synthesis of heptakis (6-deoxy-6-(4-(((3 $\beta$ -hydroxyolean-11-oxo-12-en-30-oyl)-aminoethyl)oxyethyl)oxymethyl)-1H-1,2,3-triazol-1-yl))- $\beta$ -CD (26)*

Prepared from **22** according to general procedure B, the residue was purified by RP flash chromatography (eluent: methanol) to afford **26** as a white solid in 82% yield.  $^1H$  NMR (600 MHz,  $CD_3OD:CDCl_3 = 2:1$ ):  $\delta$  7.99 (s, 7H), 5.65 (s, 7H), 5.16 (d, 7H,  $J = 2.9$  Hz), 4.56–4.92 (m, 21H), 4.42 (dd, 7H,  $J = 9.7, 5.2$  Hz), 4.21 (brs, 7H), 3.89 (t, 7H,  $J = 9.2$  Hz), 3.66–3.61 (m, 14H), 3.59–3.57 (m, 14H), 3.52–3.48 (m, 14H), 3.45 (dd, 7H,  $J = 9.7, 3.6$  Hz), 3.42 (t, 7H,  $J = 5.5$  Hz), 3.32 (t, 7H,  $J = 5.6$  Hz), 3.29 (m, 7H, overlap with  $CD_3OD$ ), 3.17 (dd, 7H,  $J = 11.7, 4.4$  Hz), 2.72 (dt, 7H,  $J = 13.4, 3.2$  Hz), 2.40 (s, 7H), 2.16 (dd, 7H,  $J = 14.3, 4.0$  Hz), 2.11 (dt, 7H,  $J = 13.3, 3.7$  Hz), 1.95 (d, 7H,  $J = 6.6$  Hz), 1.90 (d, 7H,  $J = 13.4$  Hz), 1.85 (dt, 7H,  $J = 13.3, 3.5$  Hz), 1.72–1.66 (m, 21H), 1.62 (br d, 7H,  $J = 13.6$  Hz), 1.56–1.53 (m, 7H), 1.48–1.38 (m, 35H), 1.40 (s, 21H, ), 1.23 (d, 7H,  $J = 12.8$  Hz), 1.11, 1.10, 1.09 (s, each 21H,  $21 \times CH_3$ ), 1.02 (d, 7H,  $J = 12.3$  Hz), 0.98 (s, 21H,  $7 \times CH_3$ ), 0.97 (m, 7H), 0.78, 0.77 (s, each 21H,  $14 \times CH_3$ ), 0.71 (d, 7H,  $J = 11.5$  Hz).



= 12.5 Hz), 1.12 (s, 42H, 14 × CH<sub>3</sub>), 1.10 (s, 21H, 7 × CH<sub>3</sub>), 1.03 (d, 7H, *J* = 13.3 Hz), 0.98 (s, 21H, 7 × CH<sub>3</sub>), 0.97 (m, 7H), 0.81, 0.79 (s, each 21H, 14 × CH<sub>3</sub>), 0.73 (d, 7H, *J* = 11.6 Hz); <sup>13</sup>C NMR (150 MHz, CD<sub>3</sub>OD:CDCl<sub>3</sub> = 2:1): δ 202.00, 178.29, 171.93, 145.32, 129.00, 127.17, 103.16, 83.84, 79.16, 73.92, 73.37, 71.35, 71.01, 70.78, 70.56, 64.81, 62.91, 55.99, 51.31, 46.48, 44.58, 44.33, 42.40, 40.25, 40.04, 40.03, 38.56, 38.09, 33.66, 32.73, 31.93, 29.63, 29.36, 28.64, 27.63, 27.41, 27.30, 23.91, 19.38, 18.42, 17.02, 16.30; MALDI-TOF MS *m/z*: 5504.9 [M+Na]<sup>+</sup>, 5520.4 [M+K]<sup>+</sup>.  
**5.7 Synthesis of heptakis (6-deoxy-6-(4-(((3β-hydroxy-11-oxo-olean-12-en-30-oyl)-amino)-3,6,9,12-tetraoxatridecan-13-yl)-1H-1,2,3-triazol-1-yl))-β-CD (27)**

Prepared from **23** according to general procedure B, the residue was purified by RP flash chromatography (eluent: methanol) to afford **27** as a white solid in 86% yield. <sup>1</sup>H NMR (600 MHz, MeOD:CDCl<sub>3</sub> = 2:1): δ 7.91 (s, 7H), 5.64 (s, 7H), 5.13 (s, 7H), 4.64–4.52 (m, 28H, overlap with H<sub>2</sub>O), 4.18 (br s, 7H), 3.87 (br s, 7H), 3.64–3.59 (m, 84H), 3.52 (t, 14H, *J* = 5.3 Hz), 3.45–3.42 (m, 14H), 3.37 (t, 7H, *J* = 5.2 Hz), 3.22 (br s, 7H), 3.16 (dd, 7H, *J* = 11.7, 4.5 Hz), 2.70 (dt, 7H, *J* = 10.3, 2.9 Hz), 2.37 (s, 7H), 2.15 (m, 7H, overlap with acetone), 2.07 (dt, 7H, *J* = 13.6, 4.1 Hz), 1.92 (d, 7H, *J* = 10.5 Hz), 1.87–1.85 (m, 7H), 1.83 (dt, 7H, *J* = 13.6, 4.2 Hz), 1.67–1.59 (m, 28H), 1.55–1.52 (m, 7H), 1.43–1.35 (m, 35H), 1.38 (s, 21H, 7 × CH<sub>3</sub>), 1.21 (d, 7H, *J* = 14.8 Hz), 1.10 (s, 42H, 14 × CH<sub>3</sub>), 1.09 (s, 21H, 7 × CH<sub>3</sub>), 1.02 (d, 7H, *J* = 13.6 Hz), 0.97 (s, 21H, 7 × CH<sub>3</sub>), 0.96 (m, 7H), 0.80, 0.77 (s, each 27H, 14 × CH<sub>3</sub>), 0.70 (d, 7H, *J* = 11.5 Hz); <sup>13</sup>C NMR (150 MHz, MeOD:CDCl<sub>3</sub> = 2:1): δ 201.74, 177.79, 171.43, 144.99, 126.68, 102.68, 83.21, 78.83, 78.39, 73.45, 72.88, 70.95, 70.92, 70.64, 70.43, 70.35, 64.54, 62.54, 55.60, 50.95, 49.86, 48.80, 46.11, 44.21, 43.95, 42.06, 39.87, 39.75, 39.69, 38.12, 37.70, 33.33, 32.44, 32.38, 31.67, 29.54, 29.08, 28.43, 27.26, 27.04, 26.96, 23.77, 19.13, 18.04, 16.77, 16.06; MALDI-TOF MS *m/z*: 6122.1 [M+Na]<sup>+</sup>.

**5.8 Synthesis of heptakis (6-deoxy-6-(4-(((3β-hydroxy-11-oxo-olean-12-en-30-oyl)-amino)-3,6,9,12,15,18-hexaoxonadecan-19-yl)-1H-1,2,3-triazol-1-yl))-β-CD (28)**

Prepared from **24** according to general procedure B, the residue was purified by RP flash chromatography (eluent: methanol) to afford **28** as a white solid in 83% yield. <sup>1</sup>H NMR (600 MHz, MeOD:CDCl<sub>3</sub> = 2:1): δ 8.10 (s, 7H), 5.66 (s, 7H), 5.19 (br s, 7H), 4.56–4.47 (m, 21H), 4.36 (m, 7H), 4.20 (s, 7H), 3.92 (t, 7H, *J* = 8.9 Hz), 3.67–3.57 (m, 140H), 3.55 (t, 14H, *J* = 5.6 Hz), 3.51 (d, 7H, *J* = 10.0 Hz), 3.45 (td, 7H, *J* = 13.9, 5.3 Hz), 3.39–3.36 (m, 7H), 3.34 (t, 7H, *J* = 5.7 Hz), 3.18 (dd, 7H, *J* = 11.6, 4.1 Hz), 2.73 (td, 7H, *J* = 13.4, 3.0 Hz), 2.44 (s, 7H), 2.19–2.14 (m, 14H), 1.98–

1.96 (m, 7H), 1.91–1.85 (m, 14H), 1.72–1.68 (m, 21H), 1.64 (d, 7H,  $J = 14.9$  Hz), 1.56–1.54 (m, 7H), 1.49–1.39 (m, 42H), 1.43 (s, 21H,  $7 \times \text{CH}_3$ ), 1.25 (d, 7H,  $J = 11.7$  Hz), 1.14 (s, 42H,  $14 \times \text{CH}_3$ ), 1.12 (s, 21H,  $7 \times \text{CH}_3$ ), 1.03 (t, 7H,  $J = 12.9$  Hz), 1.01 (m, 7H), 1.00, 0.83, 0.81 (s, each 27H,  $21 \times \text{CH}_3$ ), 0.77 (d, 7H,  $J = 11.6$  Hz);  $^{13}\text{C}$  NMR (150 MHz, MeOD: $\text{CDCl}_3 = 2:1$ ):  $\delta$  202.14, 178.67, 172.24, 145.35, 129.19, 127.89, 103.43, 84.46, 79.37, 74.18, 73.65, 71.77, 71.55, 71.50, 71.26, 71.18, 70.75, 64.70, 63.15, 56.21, 52.08, 49.57, 46.69, 44.82, 44.57, 42.66, 40.42, 40.36, 40.27, 38.82, 38.35, 33.86, 32.95, 32.07, 29.59, 29.42, 28.79, 27.89, 27.64, 27.50, 23.91, 19.46, 18.68, 17.11, 16.47; MALDI-TOF MS  $m/z$ : 6738.0  $[\text{M}+\text{Na}]^+$ .

#### 5.9 Synthesis of *N*-(hex-5-yn-1-yl)-3 $\beta$ -hydroxy-11-oxo-olean-12-en-30-amide (**29**)

To a solution of compound **12** (453 mg, 0.77 mmol) and hex-5-yn-1-amine (75.0 mg, 0.77 mmol) in DMF (20 mL),  $\text{Na}_2\text{CO}_3$  (81 mg, 0.77 mmol) was added. The resulting solution was vigorously stirred for 24 h at room temperature. The solvent was removed by steaming. The residue was purified by column chromatography (eluent: petroleum ether:ethyl acetate = 3:1) to afford **29** as a white solid in 92% yield. m.p. 112–114 °C;  $R_f = 0.35$  (petroleum ether:ethyl acetate = 1:1); m.p. 112–114;  $^1\text{H}$  NMR (400 MHz,  $\text{CDCl}_3$ ):  $\delta$  5.78 (t, 1H,  $J = 5.9$  Hz), 5.63 (s, 1H), 3.34–3.24 (m, 2H), 3.19 (dd, 1H,  $J = 10.3, 3.8$  Hz), 2.77–2.73 (m, 3H), 2.31 (s, 1H), 2.20 (dt, 2H,  $J = 6.8, 2.6$  Hz), 2.13 (dd, 1H,  $J = 12.9, 4.2$  Hz), 2.02 (dt, 1H,  $J = 13.7, 4.8$  Hz), 1.95 (t, 1H,  $J = 2.6$  Hz), 1.92–0.90 (m, other aliphatic ring protons), 1.34 (s, 3H,  $\text{CH}_3$ ), 1.10 (s, 9H,  $3 \times \text{CH}_3$ ), 0.97, 0.79, 0.77 (s, each 3H,  $3 \times \text{CH}_3$ ), 0.67 (d, 1H,  $J = 11.7$  Hz);  $^{13}\text{C}$  NMR (100 MHz,  $\text{CDCl}_3$ ):  $\delta$  200.03, 175.59, 169.18, 128.39, 83.95, 78.64, 68.81, 61.76, 54.89, 48.11, 45.29, 43.50, 43.15, 41.76, 39.11, 39.08, 38.82, 38.54, 37.43, 37.01, 32.69, 31.84, 31.42, 28.78, 28.44, 28.05, 27.21, 26.40, 26.33, 25.68, 23.30, 18.61, 18.00, 17.41, 16.29, 15.53; ESI-HRMS ( $m/z$ ) Calcd for  $\text{C}_{36}\text{H}_{55}\text{NO}_3$   $[\text{M}+\text{H}]^+$ : 550.4255. Found 550.4247.

#### 5.10 Synthesis of heptakis (2,3-di-*O*-acetyl-6-deoxy-6-(4-((3 $\beta$ -hydroxyolean-11-oxo-12-en-30-oyl)aminobutyl)-1*H*-1,2,3-triazol-1-yl))- $\beta$ -CD (**33**)

Prepared from **11** and **29** according to general procedure A, the residue was purified by flash chromatography (eluent:  $\text{CH}_2\text{Cl}_2$ :MeOH = 10:1) to afford **33** as a white solid in 46% yield.  $R_f = 0.15$  (eluent:  $\text{CH}_2\text{Cl}_2$ :MeOH = 10:1);  $^1\text{H}$  NMR (600 MHz,  $\text{CDCl}_3$ ):  $\delta$  7.62 (s, 7H), 6.52 (br s, 7H), 5.59 (s, 7H), 5.46 (s, 7H), 5.31 (s, 7H), 4.76 (br s, 27H), 4.47 (s, 7H), 3.56 (s, 7H), 3.32 (s, 7H), 3.16–3.06 (m, 14H), 2.71–2.61 (m, 21H), 2.30 (s, 7H), 2.13–2.11 (m, 7H), 2.11 (s, 21H,  $7 \times \text{COCH}_3$ ),

2.01 (m, 7H), 1.99 (s, 21H, 7 × COCH<sub>3</sub>), 1.98 (m, 7H), 1.85–1.80 (m, 14H), 1.71–1.32 (m, 84H), 1.36 (s, 21H, 7 × CH<sub>3</sub>), 1.17 (d, 7H, *J* = 11.3 Hz), 1.10 (s, 63H, 21 × CH<sub>3</sub>), 1.01 (m, 7H), 0.98 (s, 21H, 7 × CH<sub>3</sub>), 0.87 (m, 7H), 0.78 (s, 42H, 14 × CH<sub>3</sub>), 0.65 (br s, 7H); <sup>13</sup>C NMR (150 MHz, CDCl<sub>3</sub>): δ 199.88, 175.81, 170.36, 169.67, 169.37, 147.66, 128.21, 124.07, 96.54, 78.79, 76.92, 70.50, 68.64, 69.82, 61.81, 55.06, 49.91, 48.29, 45.40, 43.43, 43.21, 41.67, 39.55, 39.21, 39.09, 37.52, 37.06, 32.72, 31.87, 31.38, 29.49, 29.29, 28.51, 28.21, 27.19, 26.71, 26.52, 26.37, 25.14, 23.39, 20.74, 20.68, 18.67, 17.46, 16.45, 15.60; MALDI-TOF MS *m/z*: 5750.2 [M+H]<sup>+</sup>; 5771.9 [M+Na]<sup>+</sup>.

*5.11 Synthesis of heptakis (6-deoxy-6-(4-((3β-hydroxyolean-11-oxo-12-en-30-oyl)aminobutyl)-1H-1,2,3-triazol-1-yl))-β-CD (34)*

Prepared from **33** according to general procedure B, the residue was purified by RP flash chromatography (eluent: methanol) to afford **34** as a white solid in 95% yield. <sup>1</sup>H NMR (600 MHz, CD<sub>3</sub>OD:CDCl<sub>3</sub> = 2:1): δ 7.66 (s, 7H), 5.62 (s, 7H), 5.14 (s, 7H), 4.58 (d, 7H, *J* = 12.5 Hz), 4.45 (d, 7H, *J* = 10.6 Hz), 4.16 (d, 7H, *J* = 7.8 Hz), 3.89 (t, 7H, *J* = 7.7 Hz), 3.41 (d, 7H, *J* = 9.1 Hz), 3.24–3.19 (m, 14H), 3.16 (dd, 7H, *J* = 11.6, 4.2 Hz), 3.14–3.11 (m, 7H), 2.71 (d, 7H, *J* = 12.8 Hz), 2.63–2.58 (m, 7H), 2.56–2.51 (m, 7H), 2.38 (s, 7H), 2.13 (br d, 7H, *J* = 14.9 Hz), 2.09 (t, 7H, *J* = 12.2 Hz), 1.94–1.90 (m, 14H), 1.83 (t, 7, *J* = 11.9 Hz), 1.68–1.52 (m, 63H), 1.43–1.36 (m, 35H), 1.39 (s, 21H, 7 × CH<sub>3</sub>), 1.21 (d, 7H, *J* = 11.2 Hz), 1.11 (2 × s, 42H, 14 × CH<sub>3</sub>), 1.09 (s, 21H, 7 × CH<sub>3</sub>), 1.01 (m, 7H), 0.98 (s, 21H, 7 × CH<sub>3</sub>), 0.97 (m, 7H), 0.78 (s, 42H, 14 × CH<sub>3</sub>), 0.71 (d, 7H, *J* = 11.5 Hz); <sup>13</sup>C NMR (150 MHz, CD<sub>3</sub>OD:CDCl<sub>3</sub> = 2:1): δ 201.93, 177.94, 171.87, 148.34, 128.85, 125.02, 103.12, 83.71, 79.05, 73.65, 73.28, 71.07, 62.76, 55.85, 50.85, 49.57, 48.29, 46.36, 44.39, 44.23, 42.20, 40.14, 39.93, 39.81, 38.46, 37.95, 36.31, 33.55, 32.68, 32.60, 31.79, 30.48, 30.37, 30.27, 30.24, 30.09, 29.89, 29.75, 29.28, 28.57, 27.83, 27.47, 27.43, 27.27, 27.17, 25.62, 23.86, 19.31, 18.29, 16.95, 16.22; MALDI-TOF MS *m/z*: 5182.0 [M+Na]<sup>+</sup>.

*5.12 Synthesis of heptakis (2,3-di-O-acetyl-6-deoxy-6-(4-((3β-hydroxyolean-11-oxo-12-en-30-oyl)aminophenyl)-1H-1,2,3-triazol-1-yl))-β-CD (35)*

Prepared from **11** and **30** according to general procedure A, the residue was purified by flash chromatography (eluent: CH<sub>2</sub>Cl<sub>2</sub>:MeOH = 15:1) to afford **35** as a white solid in 70% yield. *R*<sub>f</sub> = 0.30 (eluent: CH<sub>2</sub>Cl<sub>2</sub>:MeOH = 10:1); <sup>1</sup>H NMR (600 MHz, CDCl<sub>3</sub>): δ 8.01–7.66 (m, 28H), 7.48 (s, 7H), 5.65 (s, 7H), 5.48 (s, 7H), 5.35 (m, 7H), 4.81–4.59 (m, 28H), 3.66 (m, 7H), 3.22 (d, 7H, *J* = 5.0 Hz), 2.78 (s, 7H), 2.31 (s, 7H), 2.22 (m, 7H), 2.04 (m, 7H), 2.07 (s, 21H, 7 × COCH<sub>3</sub>), 2.01 (m, 7H),

2.00 (s, 21H, 7 × CH<sub>3</sub>), 1.98 (m, 7H), 1.81 (m, 7H), 1.73–1.32 (m, 70H), 1.36, 1.22 (s, each 27H, 14 × CH<sub>3</sub>), 1.17 (m, 7H), 1.10 (s, 42H, 21 × CH<sub>3</sub>), 1.02 (m, 7H), 1.00 (s, 42H, 14 × CH<sub>3</sub>), 0.96 (m, 7H), 0.79 (s, 42H, 21 × CH<sub>3</sub>), 0.69 (d, 7H, *J* = 7.9 Hz); <sup>13</sup>C NMR (150 MHz, CDCl<sub>3</sub>): δ 200.04, 174.24, 170.32, 169.42, 147.16, 138.03, 128.38, 126.17, 122.40, 120.64, 96.73, 78.72, 77.33, 70.56, 69.78, 69.57, 61.84, 54.94, 50.22, 48.06, 45.37, 44.52, 43.22, 41.62, 39.14, 39.11, 37.43, 37.05, 32.74, 31.94, 31.69, 29.09, 28.48, 28.10, 27.28, 26.42, 23.41, 20.73, 18.67, 17.46, 16.32, 15.60; MALDI-TOF MS *m/z*: 5889.3 [M+H]<sup>+</sup>.

*5.13 Synthesis of heptakis (6-deoxy-6-(4-(((3β-hydroxyolean-11-oxo-12-en-30-oyl)aminophenyl)-1H-1,2,3-triazol-1-yl))-β-CD (36)*

Prepared from **35** according to general procedure B, the residue was purified by RP flash chromatography (eluent: methanol) to afford **36** as a white solid in 83% yield. <sup>1</sup>H NMR (600 MHz, DMSO-*d*<sub>6</sub>): δ 9.15 (s, 7H), 8.08 (s, 7H), 7.50 (s, 28H), 5.43 (s, 7H), 5.13 (s, 7H), 4.52 (s, 7H), 4.31 (s, 7H), 4.13 (s, 14H), 3.75 (s, 7H), 3.40 (s, 7H), 3.34 (s, 7H), 3.02 (s, 7H), 2.59 (s, 7H), 2.30 (s, 7H), 2.10–2.05 (m, 21H), 1.94 (s, 7H), 1.71 (s, 7H), 1.61–1.27 (m, 56H), 1.32 (s, each 21H, 7 × CH<sub>3</sub>), 1.12 (m, 7H), 1.10, 1.02, 1.00 (s, each 21H, 21 × CH<sub>3</sub>), 0.93 (m, 14H), 0.90 (s, 21H, 7 × CH<sub>3</sub>), 0.69, 0.68 (s, each 21H, 14 × CH<sub>3</sub>), 0.67 (m, 7H); <sup>13</sup>C NMR (150 MHz, DMSO-*d*<sub>6</sub>): δ 198.78, 174.13, 169.38, 145.88, 138.58, 127.49, 125.53, 125.16, 122.46, 120.58, 101.83, 82.92, 76.58, 72.45, 71.83, 69.52, 61.14, 54.11, 49.41, 47.61, 44.75, 43.84, 42.82, 40.67, 38.74, 38.50, 37.24, 36.62, 32.09, 31.39, 30.37, 28.33, 28.11, 26.93, 25.98, 25.85, 23.01, 18.28, 17.12, 16.12, 15.94; MALDI-TOF MS *m/z*: 5298.1 [M+H]<sup>+</sup>.

*5.14 Synthesis of heptakis (2,3-di-O-acetyl-6-deoxy-6-(4-(((3β-hydroxyolean-11-oxo-12-en-30-oyl) piperazine)ethanamine)-1H-1,2,3-triazol-1-yl))-β-CD (37)*

Prepared from **11** and **32** according to general procedure A, the residue was purified by flash chromatography (eluent: CH<sub>2</sub>Cl<sub>2</sub>:MeOH = 2:1) to afford **37** as a white foam solid in 30% yield. *R*<sub>f</sub> = 0.15 (eluent: CH<sub>2</sub>Cl<sub>2</sub>:MeOH = 3:1); <sup>1</sup>H NMR (600 MHz, CDCl<sub>3</sub>): δ 7.72 (s, 7H), 6.58 (br s, 7H), 5.68 (s, 7H), 5.51 (s, 7H), 5.35 (t, 7H, *J* = 8.5 Hz), 4.92 (d, 7H, *J* = 12.5 Hz), 4.79 (d, 7H, *J* = 11.7 Hz), 4.70 (dd, 7H, *J* = 9.5, 2.6 Hz), 4.48 (d, 7H, *J* = 5.0 Hz), 3.54–3.47 (m, 21H), 3.40–3.26 (m, 14H), 3.19 (dd, 7H, *J* = 11.2, 4.4 Hz), 2.74 (td, 7H, *J* = 13.2, 3.2 Hz), 2.47 (s, 70H), 2.15 (dd, 7H, *J* = 13.5, 3.5 Hz), 2.04 (s, 21H, 7 × COCH<sub>3</sub>), 2.01–2.00 (m, 14H), 1.99 (s, 21H, 7 × COCH<sub>3</sub>), 1.98–1.96 (m, 14H), 1.84–1.41 (m, 77H), 1.37 (s, 21H, 7 × CH<sub>3</sub>), 1.33–1.18 (m, 21H), 1.12, 1.11, 1.10

(each s, each 21H, 21 × CH<sub>3</sub>), 1.02 (d, 7H, *J* = 11.0 Hz), 0.99 (s, 21H, 7 × CH<sub>3</sub>), 0.93–0.90 (m, 7H), 0.79 (s, 42H, 14 × CH<sub>3</sub>), 0.67 (d, 7H, *J* = 11.6 Hz); <sup>13</sup>C NMR (150 MHz, CDCl<sub>3</sub>): δ 199.87, 175.86, 170.37, 144.75, 128.36, 125.62, 96.32, 78.64, 77.20, 70.60, 69.73, 61.83, 56.67, 55.03, 53.22, 53.08, 52.63, 49.94, 48.14, 45.42, 43.56, 43.19, 41.73, 39.39, 39.15, 37.50, 37.05, 35.94, 32.74, 31.88, 31.42, 29.59, 28.60, 28.18, 27.36, 26.49, 26.39, 23.42, 20.75, 20.70, 18.67, 17.46, 16.46, 15.71; MALDI-TOF MS *m/z*: 6239.4 [M+H]<sup>+</sup>; 6261.9 [M+Na]<sup>+</sup>.

*5.15 Synthesis of heptakis (6-deoxy-6-(4-(((3β-hydroxyolean-11-oxo-12-en-30-oyl) piperazine)ethanamine)-1H-1,2,3-triazol-1-yl))-β-CD (38)*

Prepared from **37** according to general procedure B, the residue was purified by RP flash chromatography (eluent: methanol) to afford **38** as a white solid in 87% yield. <sup>1</sup>H NMR (600 MHz, CD<sub>3</sub>OD:CDCl<sub>3</sub> = 2:1): δ 7.89 (s, 7H), 5.66 (s, 7H), 5.14 (s, 7H), 4.63 (d, 7H, *J* = 13.3 Hz), 4.52 (d, 7H, *J* = 10.9 Hz), 4.20 (d, 7H, *J* = 7.4 Hz), 3.89 (t, 7H, *J* = 8.9 Hz), 3.61–3.37 (m, 28H), 3.28–3.22 (m, 14H), 3.17 (dd, 7H, *J* = 10.1, 3.7 Hz), 2.71 (br d, 7H, *J* = 12.6 Hz), 2.55 (br s, 28H), 2.49 (s, 28H), 2.40 (s, 7H), 2.11–1.44 (m, 98H), 1.40 (s, 21H, 7 × CH<sub>3</sub>), 1.37–1.21 (m, 49H), 1.12 (s, 42H, 14 × CH<sub>3</sub>), 1.10 (s, 21H, 7 × CH<sub>3</sub>), 1.03 (d, 7H, *J* = 13.4 Hz), 0.97 (s, 21H, 7 × CH<sub>3</sub>), 0.81 (s, 21H, 7 × CH<sub>3</sub>), 0.78 (s, 21H, 7 × CH<sub>3</sub>), 0.72 (d, 7H, *J* = 11.6 Hz); <sup>13</sup>C NMR (150 MHz, CD<sub>3</sub>OD:CDCl<sub>3</sub> = 2:1): δ 201.96, 178.10, 171.85, 144.11, 128.99, 127.38, 103.16, 83.60, 73.71, 73.30, 71.07, 62.84, 57.90, 55.91, 54.38, 53.42, 51.00, 47.61, 46.44, 44.51, 44.26, 42.26, 40.17, 39.99, 38.51, 38.02, 37.11, 33.59, 32.74, 32.69, 31.86, 29.71, 29.38, 28.60, 27.57, 27.32, 27.22, 23.92, 19.34, 18.35, 17.00, 16.27; MALDI-TOF MS *m/z*: 5650.2 [M+H]<sup>+</sup>; 5672.9 [M+Na]<sup>+</sup>.

## 6. Selected NMR and MALDI-TOF MS spectra of conjugates **21-28** and **33-38**

### <sup>1</sup>H NMR of compound **21**

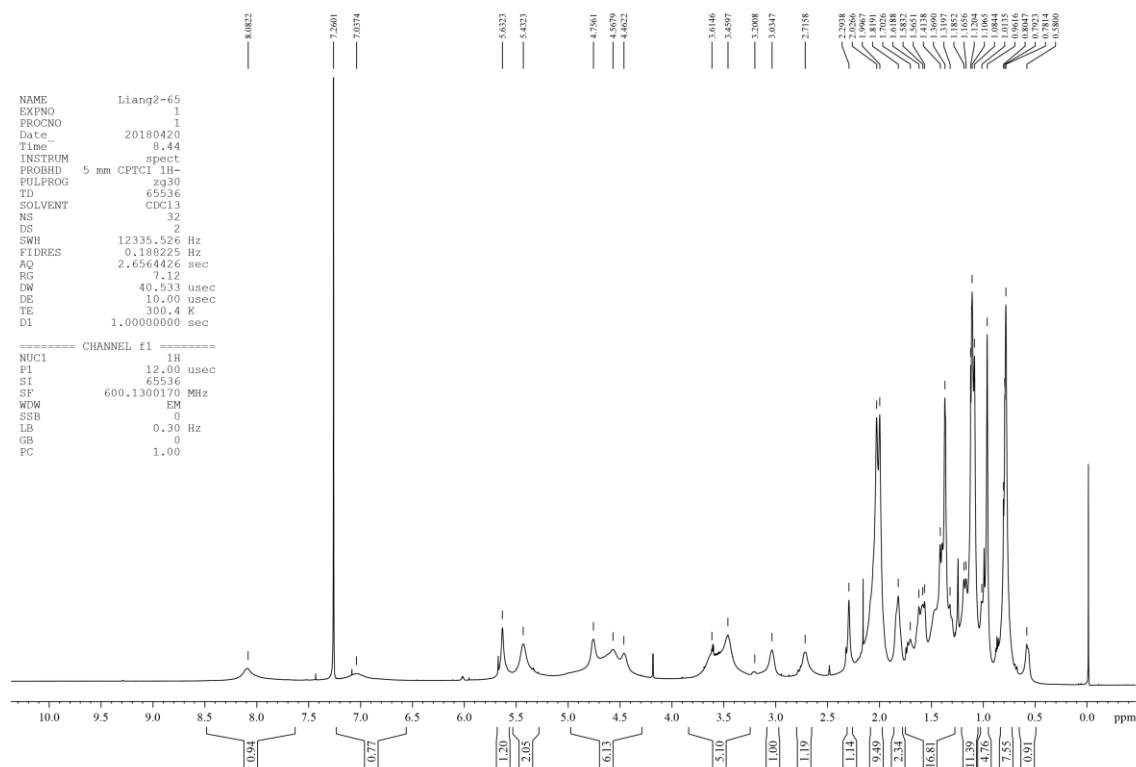

### <sup>13</sup>C NMR of compound **21**

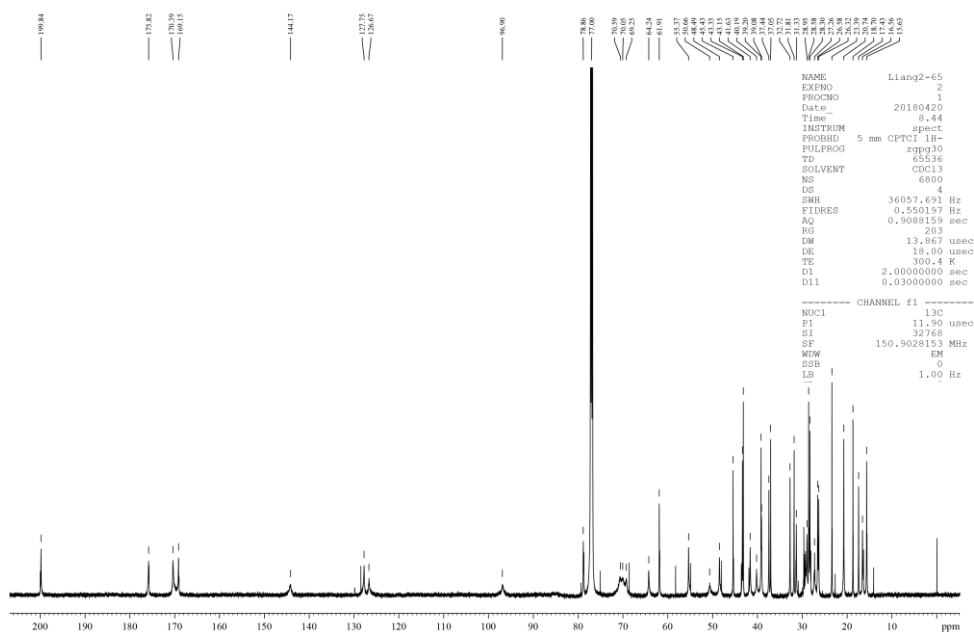

## HSQC of compound 21

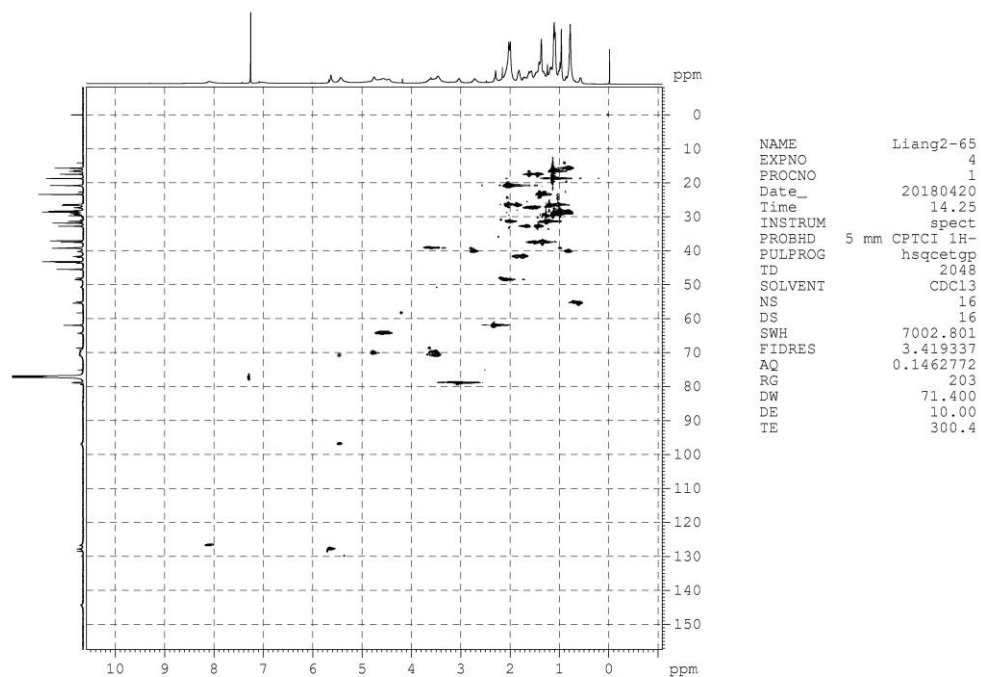

## MALDI-TOF of compound 21

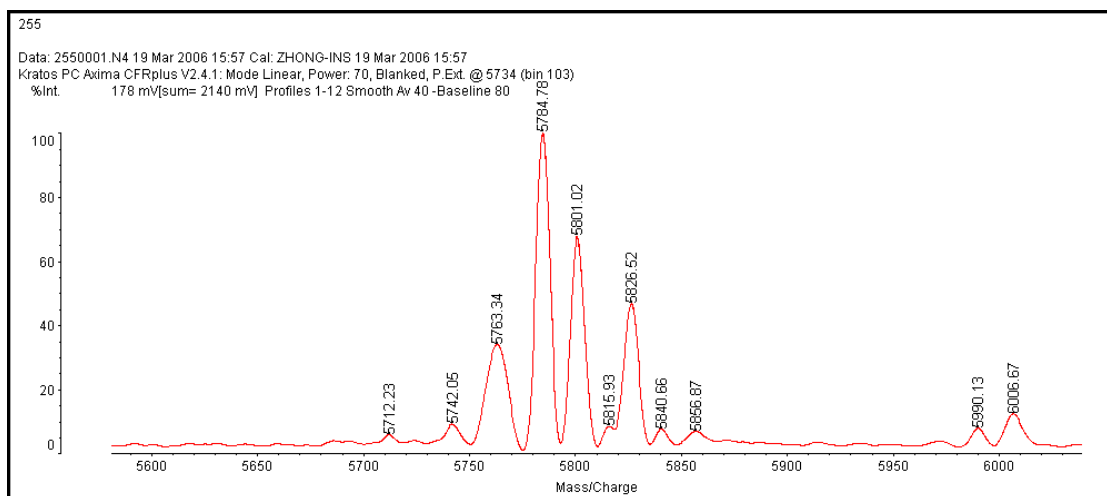

### <sup>1</sup>H NMR of compound **22**

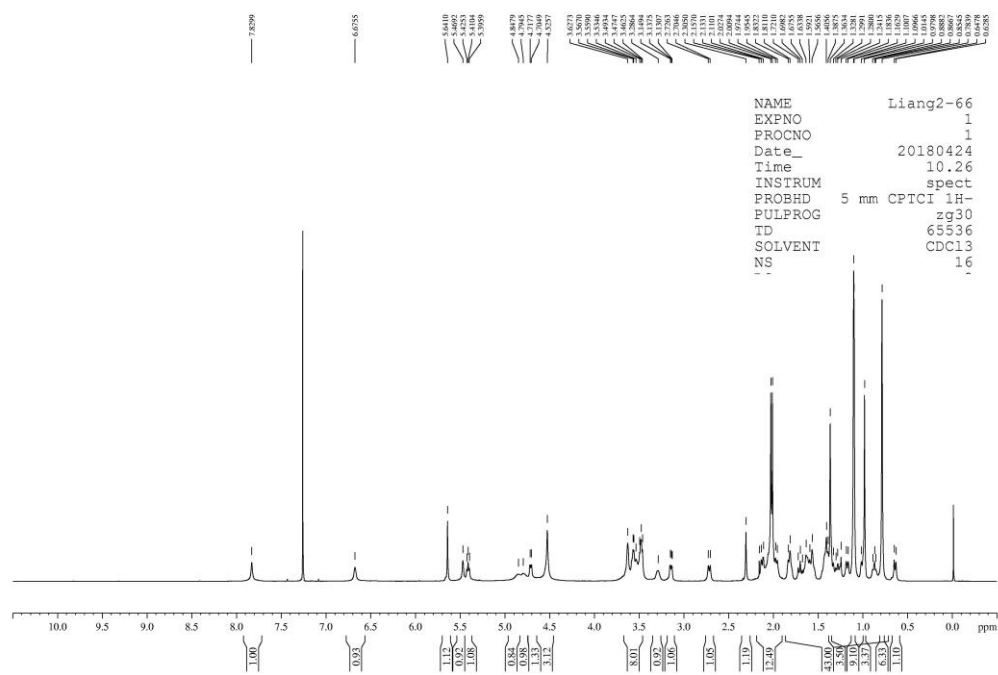 $^{13}\text{C}$  NMR of compound **22**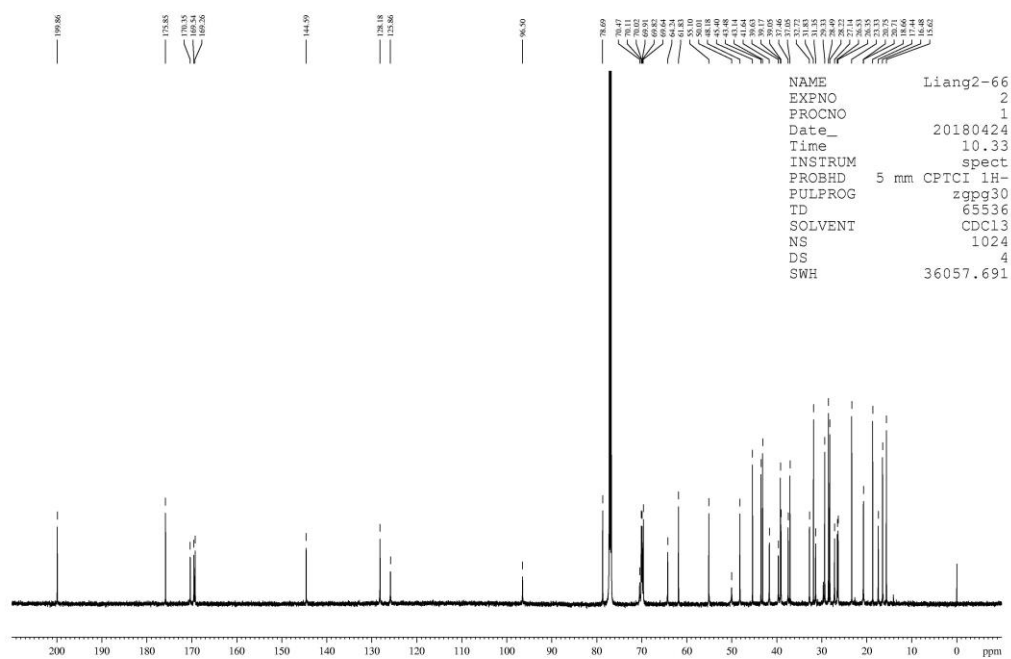



## HSQC of compound 22

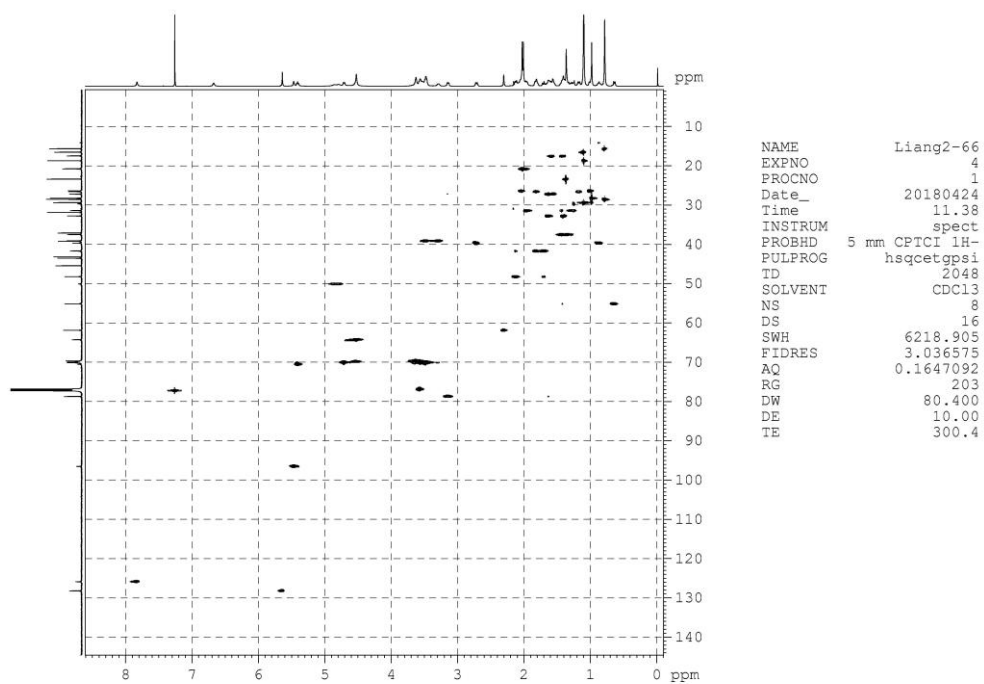

## MALDI-TOF of compound 22

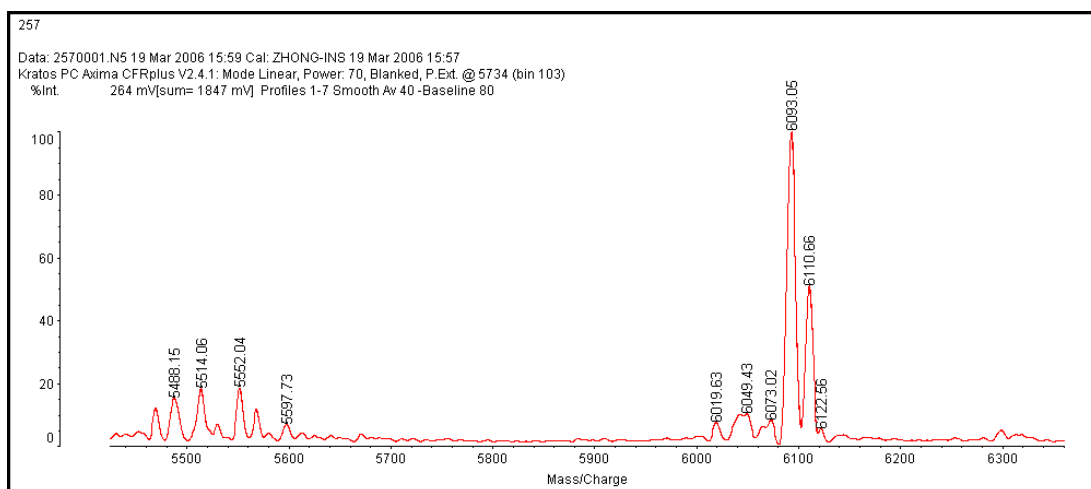

## S18

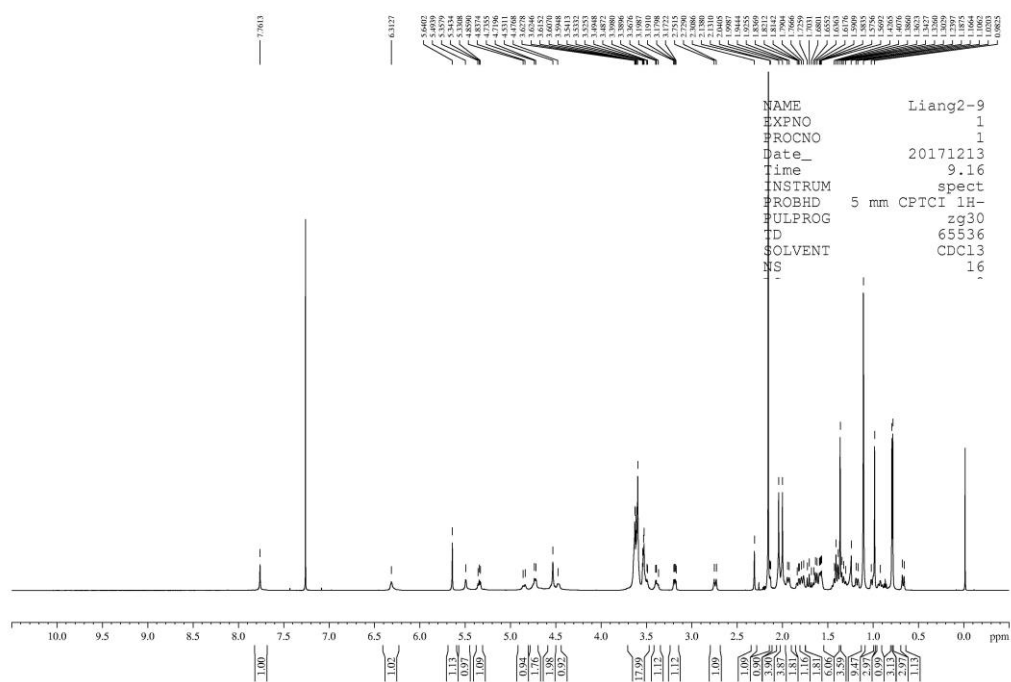

### <sup>13</sup>C NMR of compound **23**

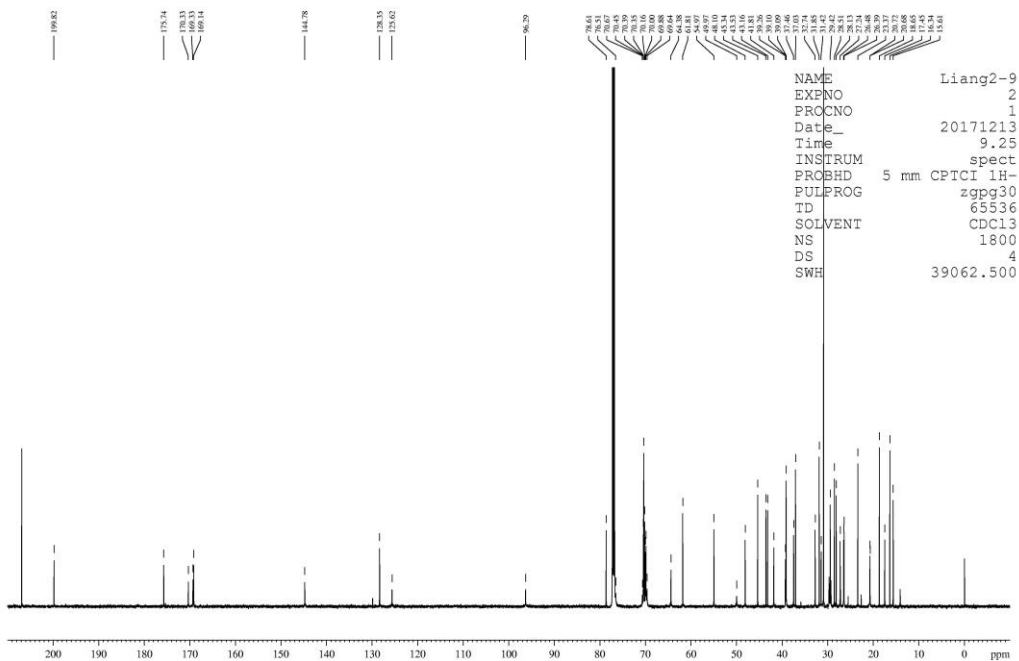

### HSQC of compound **23**

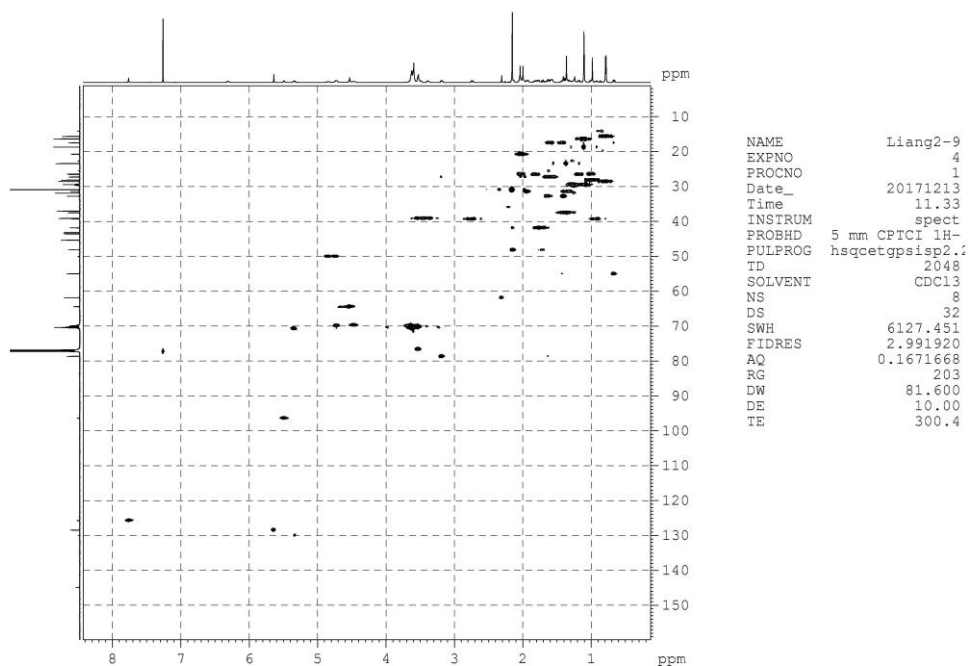

### MALDI-TOF of compound **23**

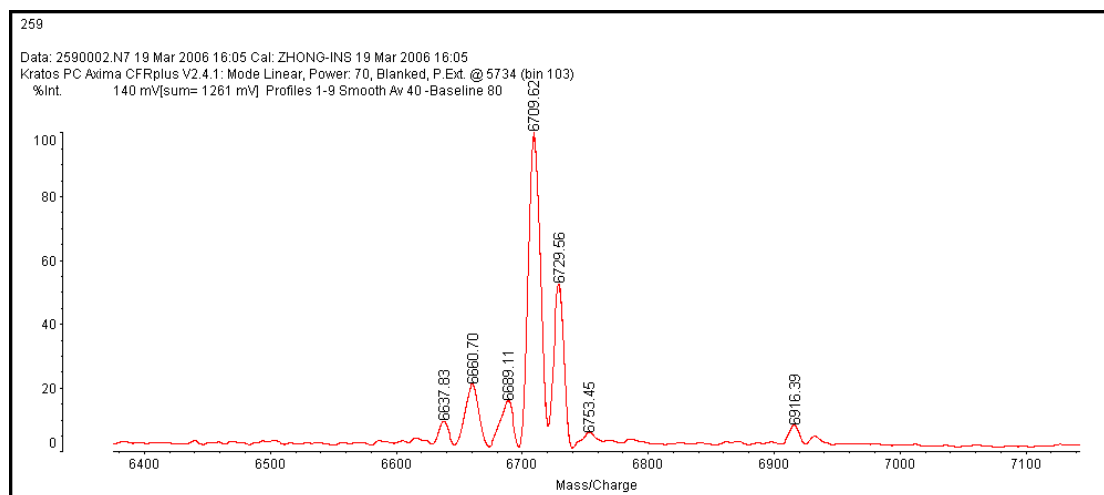

### <sup>1</sup>H NMR of compound **24**

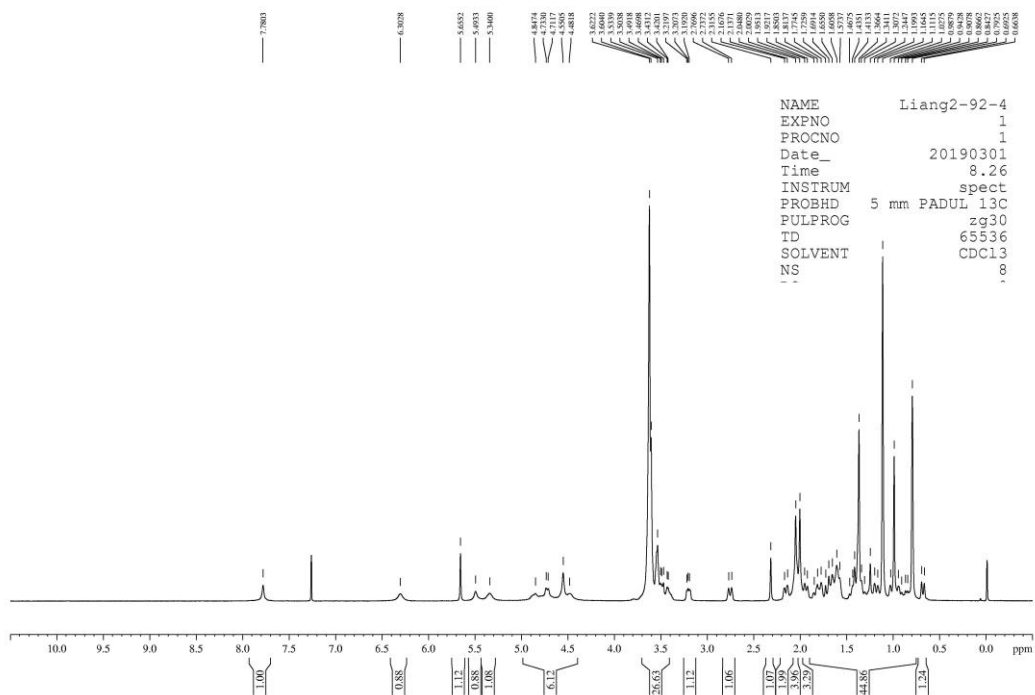

### <sup>13</sup>C NMR of compound **24**

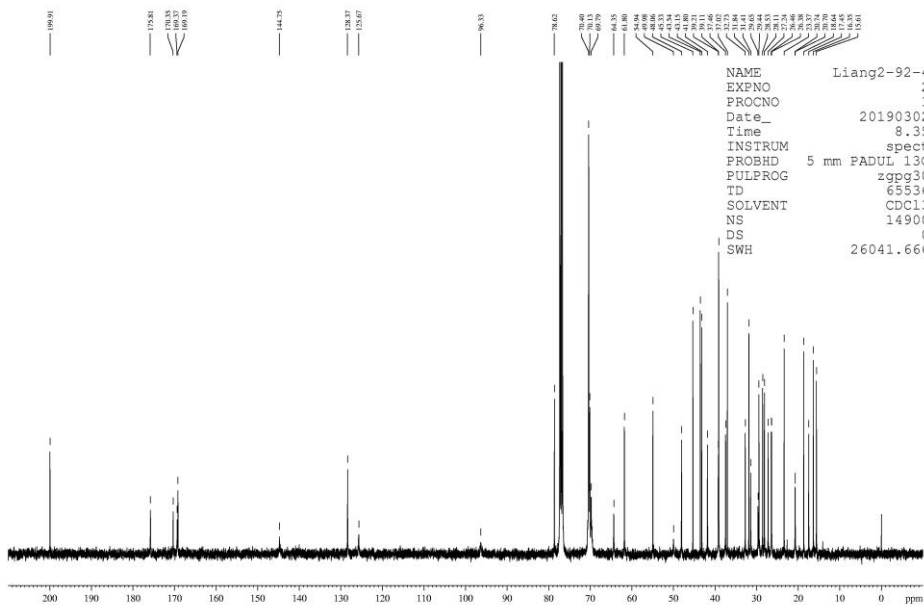

## HSQC of compound **24**

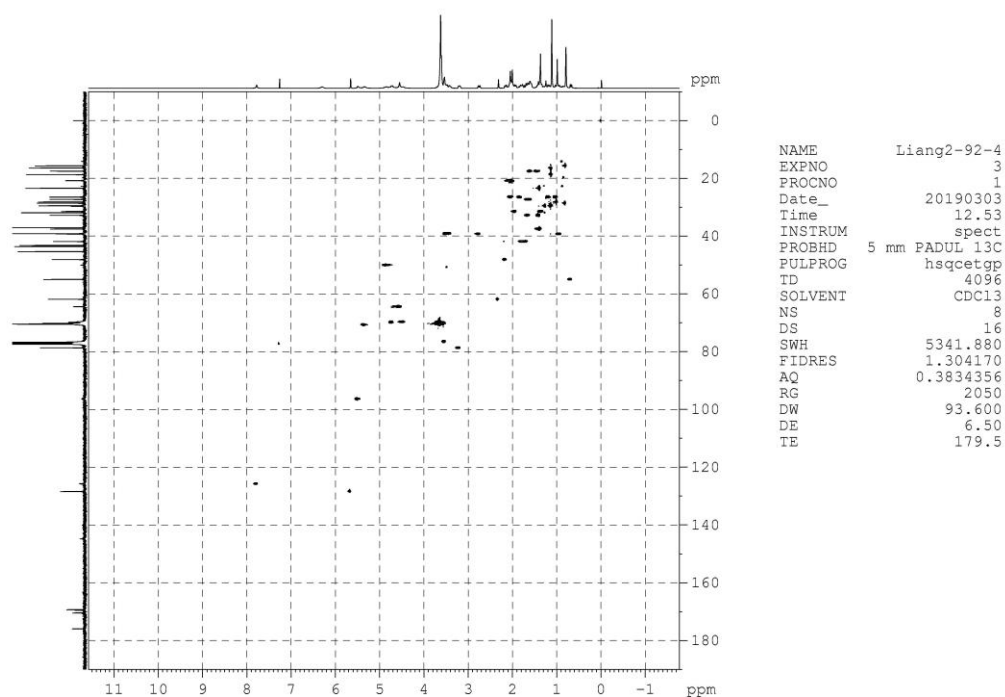

## MALDI-TOF of compound **24**

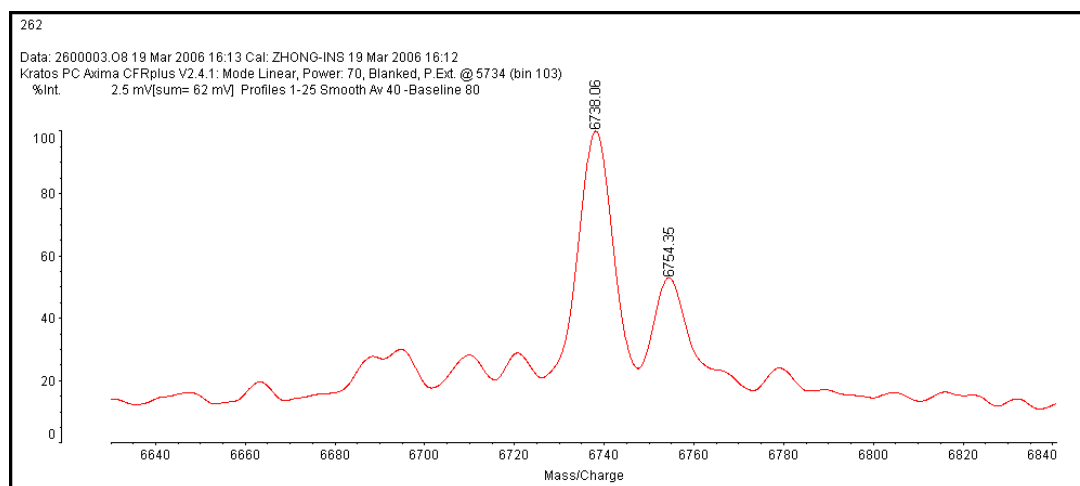

### <sup>1</sup>H NMR of compound **25**

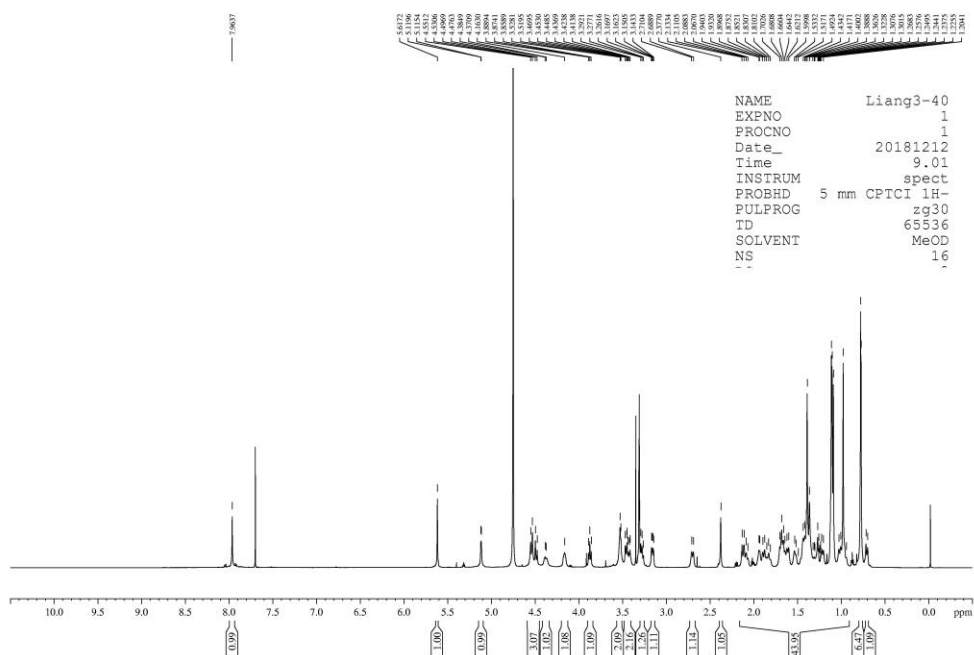 $^{13}\text{C}$  NMR of compound **25**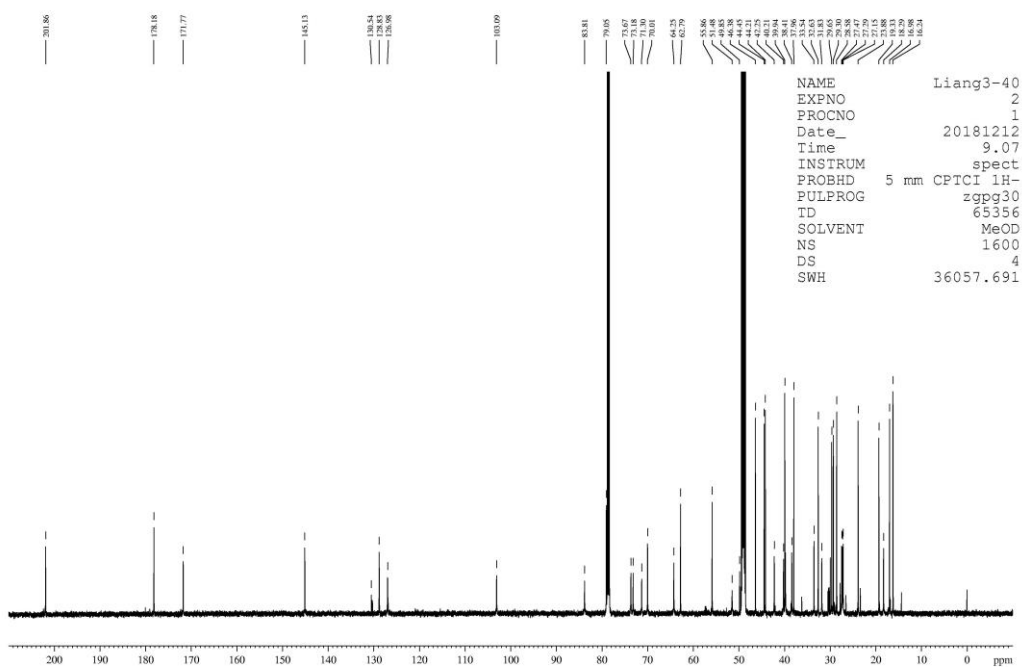

## HSQC of compound 25

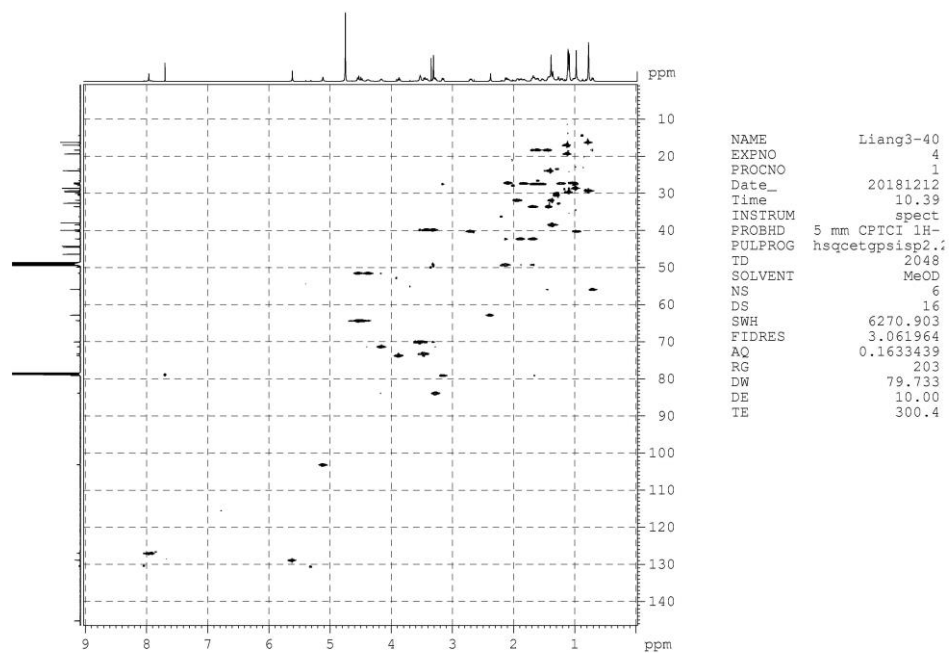

## MALDI-TOF of compound 25

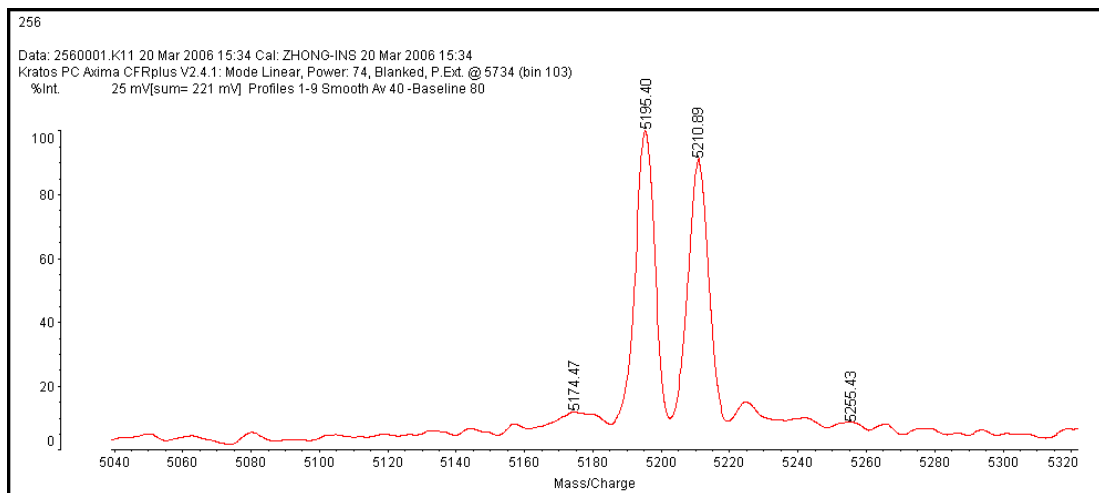

<sup>1</sup>H NMR of compound **26**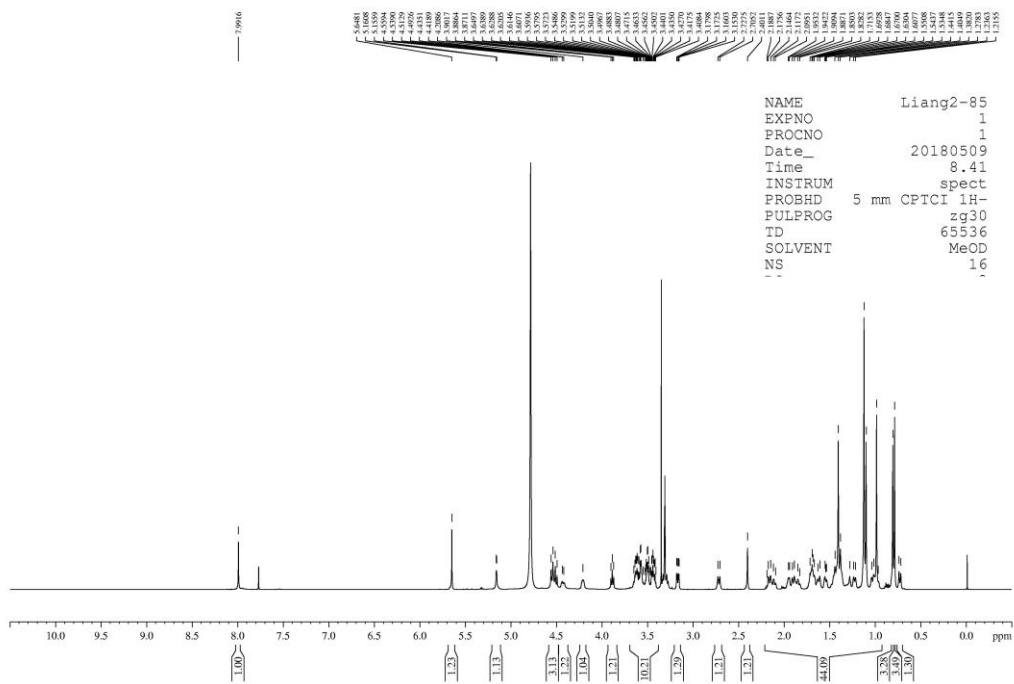 $^{13}\text{C}$  NMR of compound **26**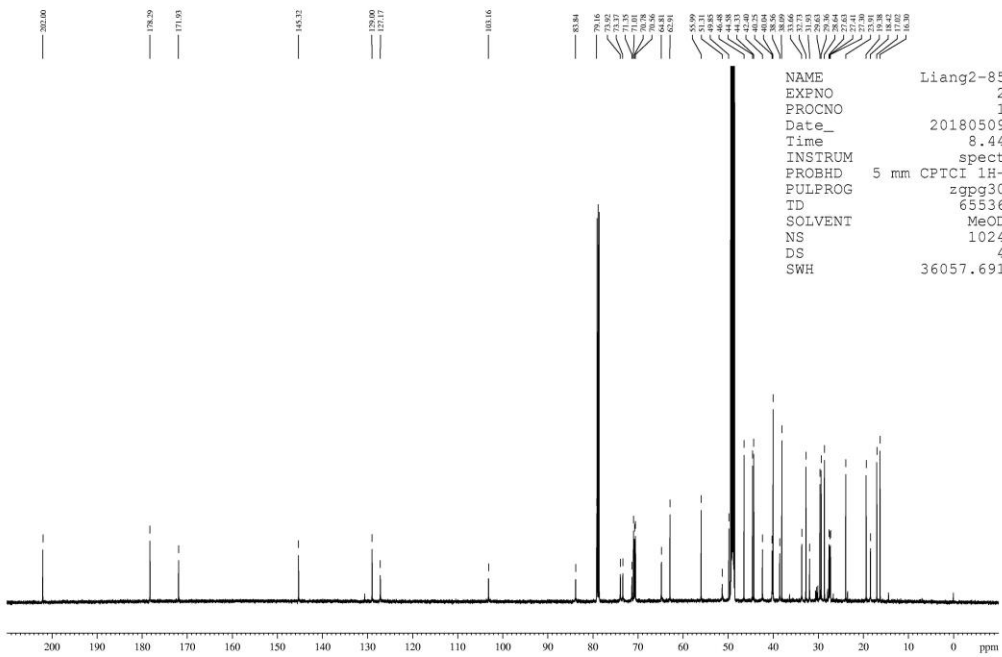



## HSQC of compound 26

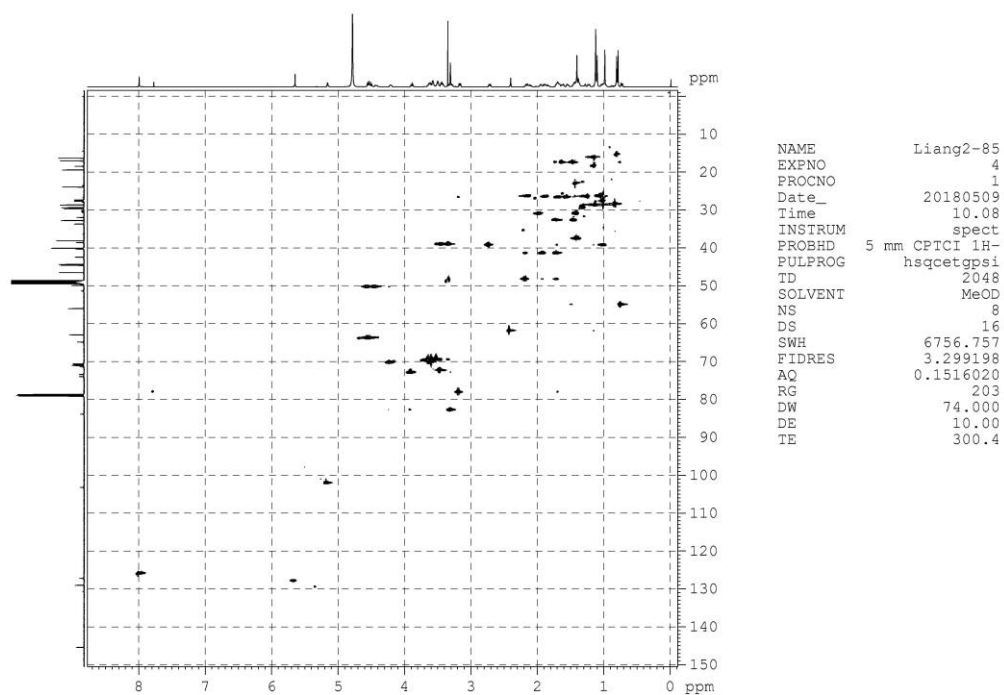

## MALDI-TOF of compound 26

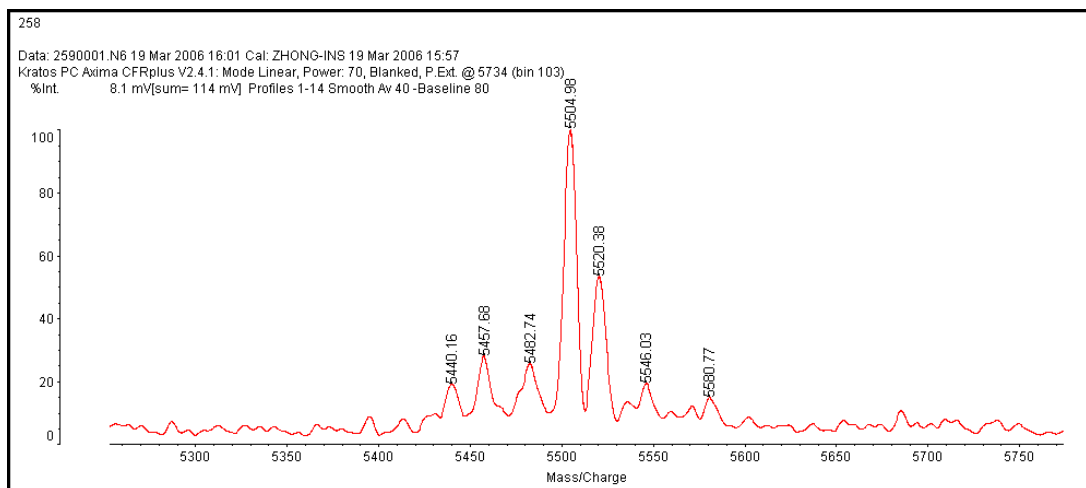

<sup>1</sup>H NMR of compound **27**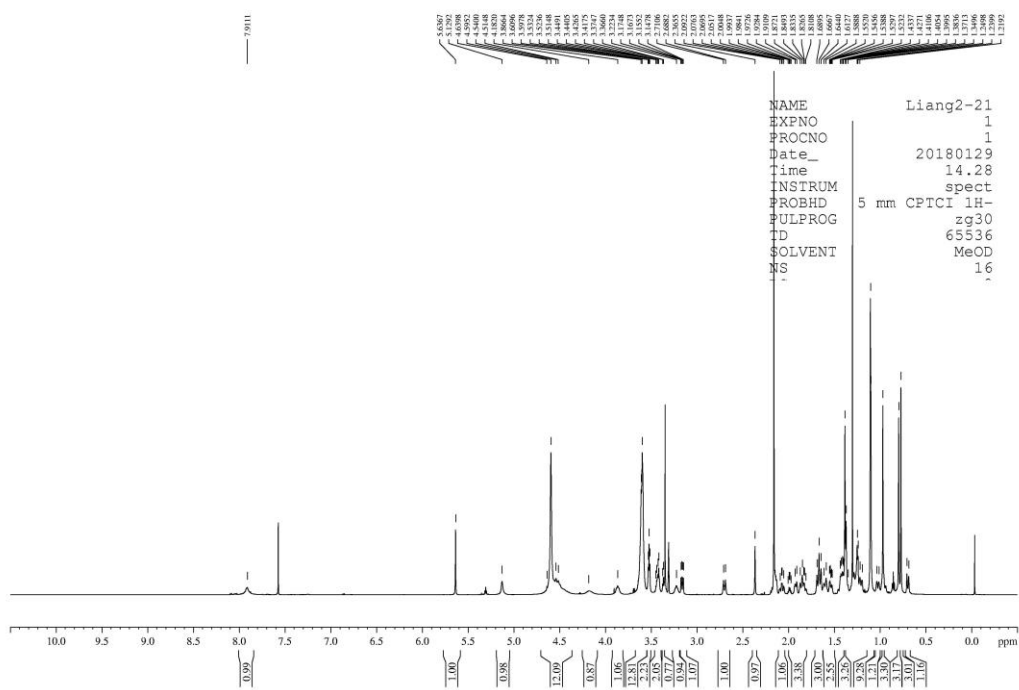<sup>13</sup>C NMR of compound **27**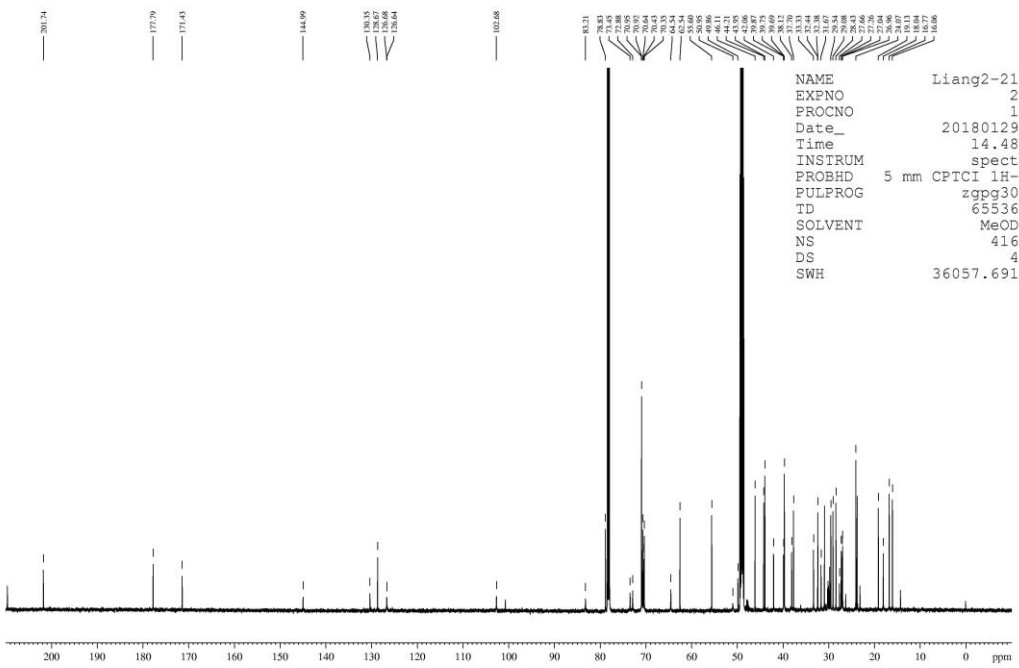

# HSQC of compound **27**

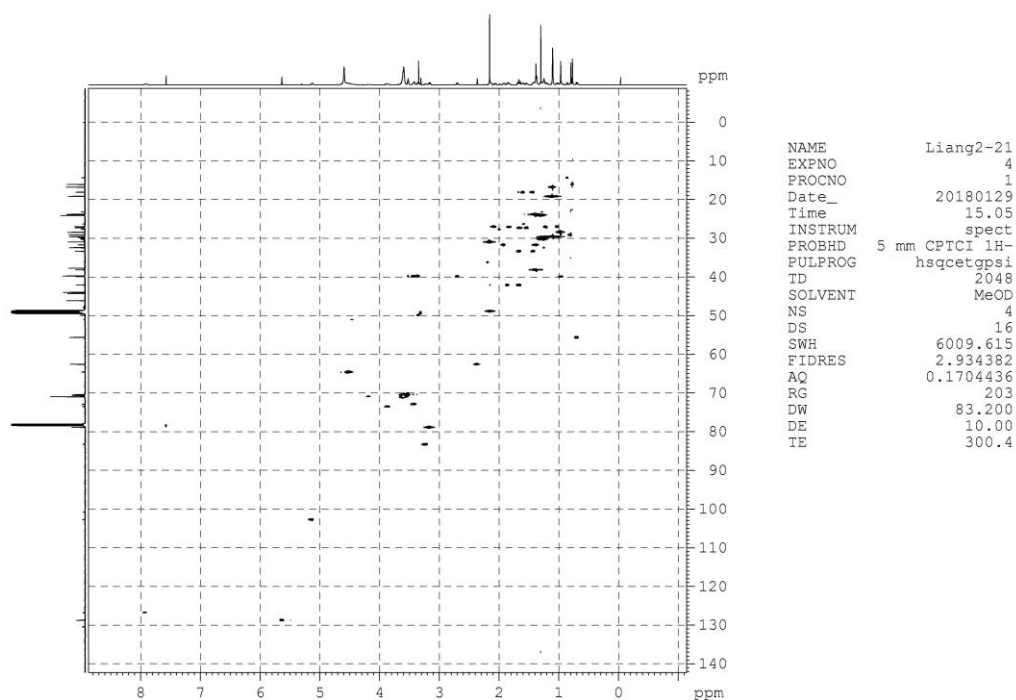

# MALDI-TOF of compound **27**

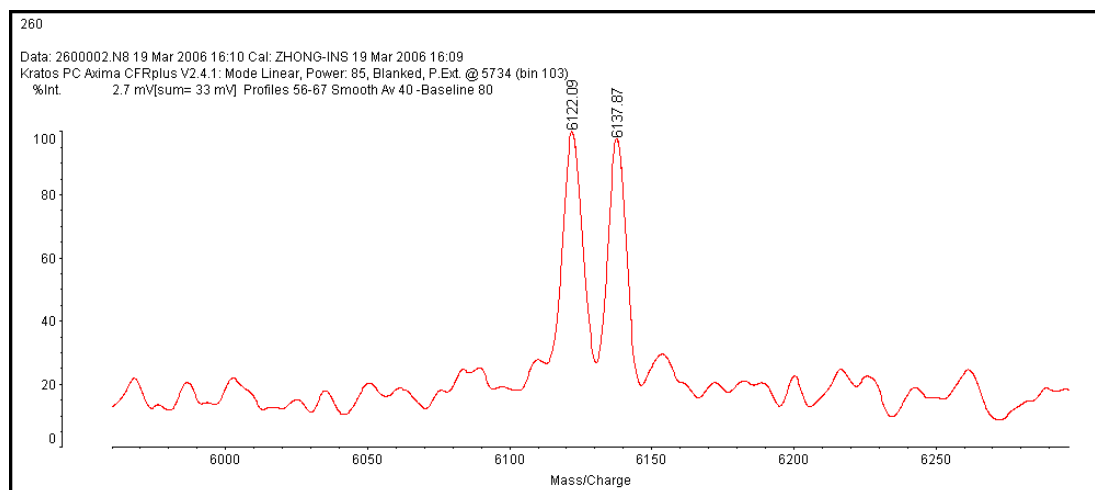

### <sup>1</sup>H NMR of compound **28**

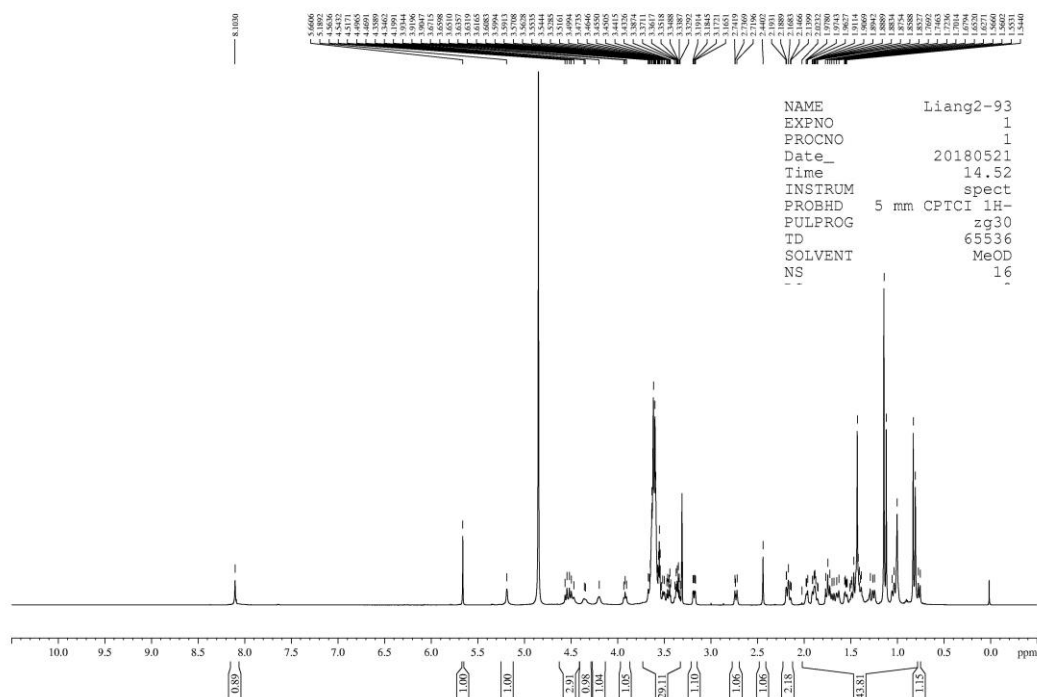<sup>13</sup>C NMR of compound **28**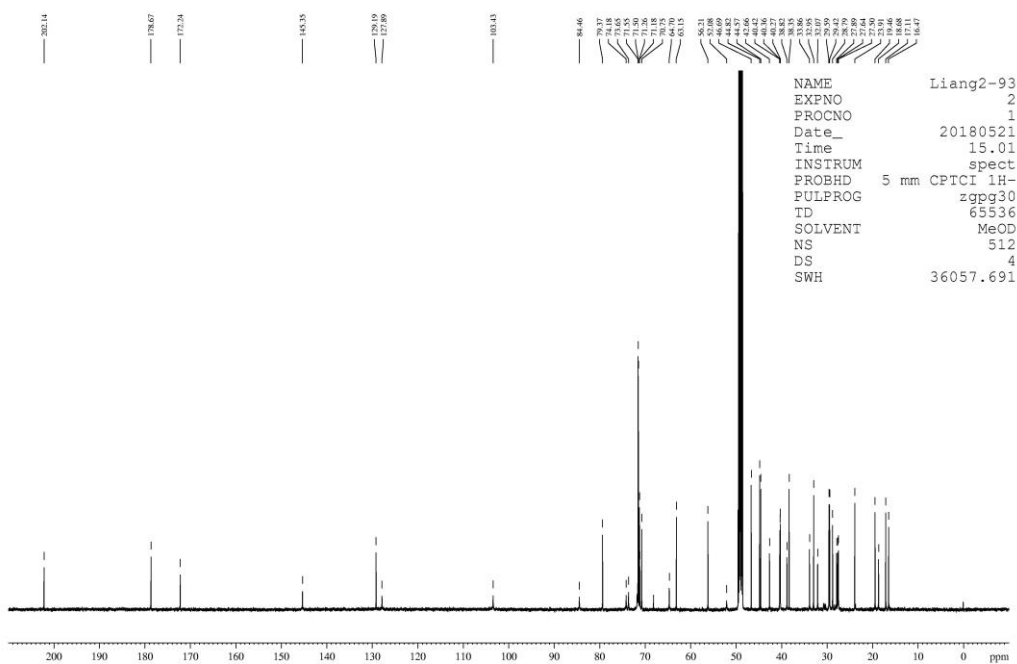

## HSQC of compound 28

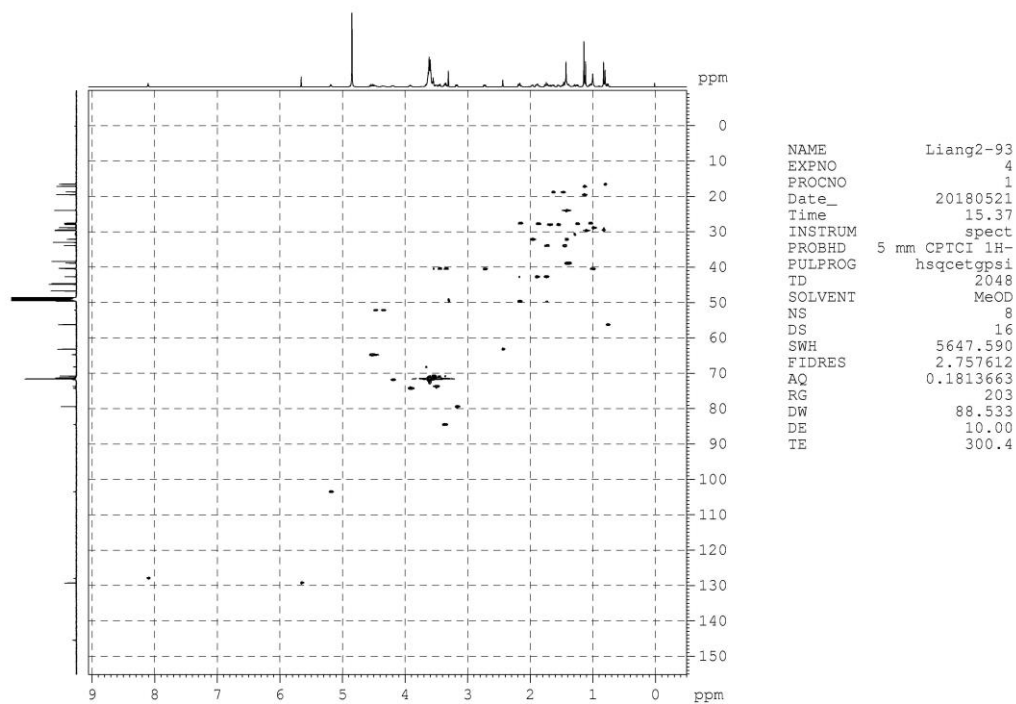

## MALDI-TOF of compound 28



### <sup>1</sup>H NMR of compound **33**

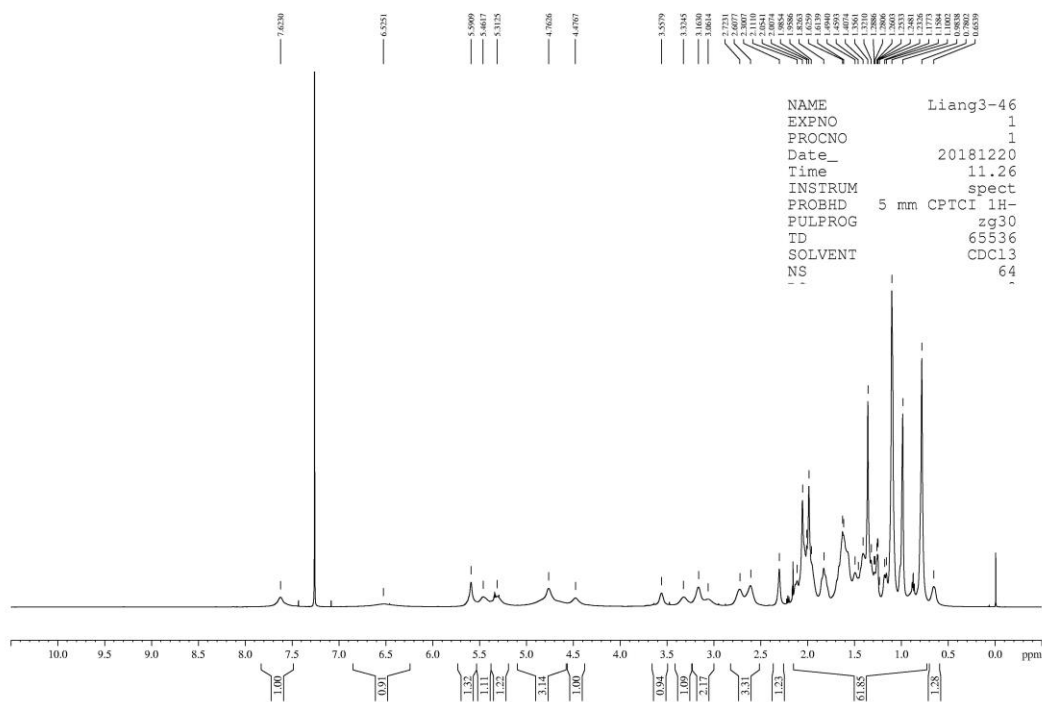

### <sup>13</sup>C NMR of compound **33**

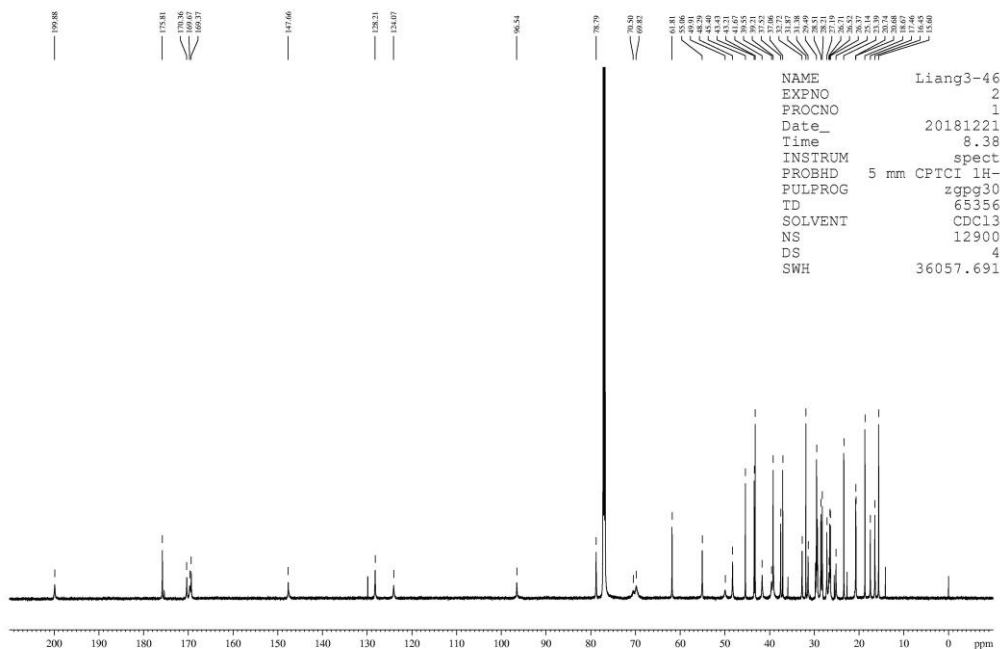

### HSQC of compound 33

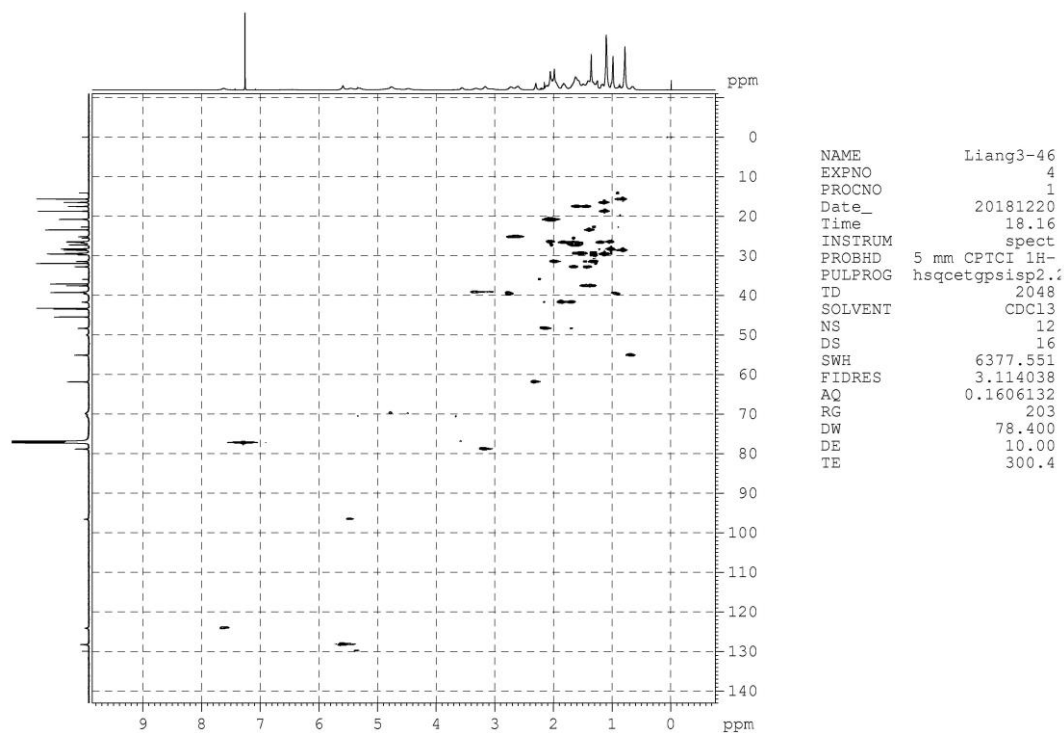

### MALDI-TOF of compound 33

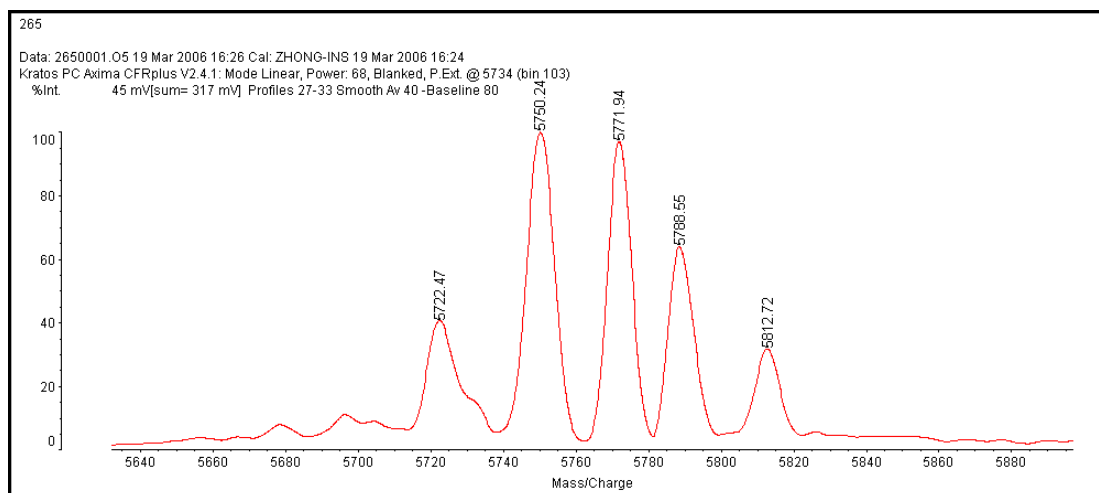

# <sup>1</sup>H NMR of compound **34**

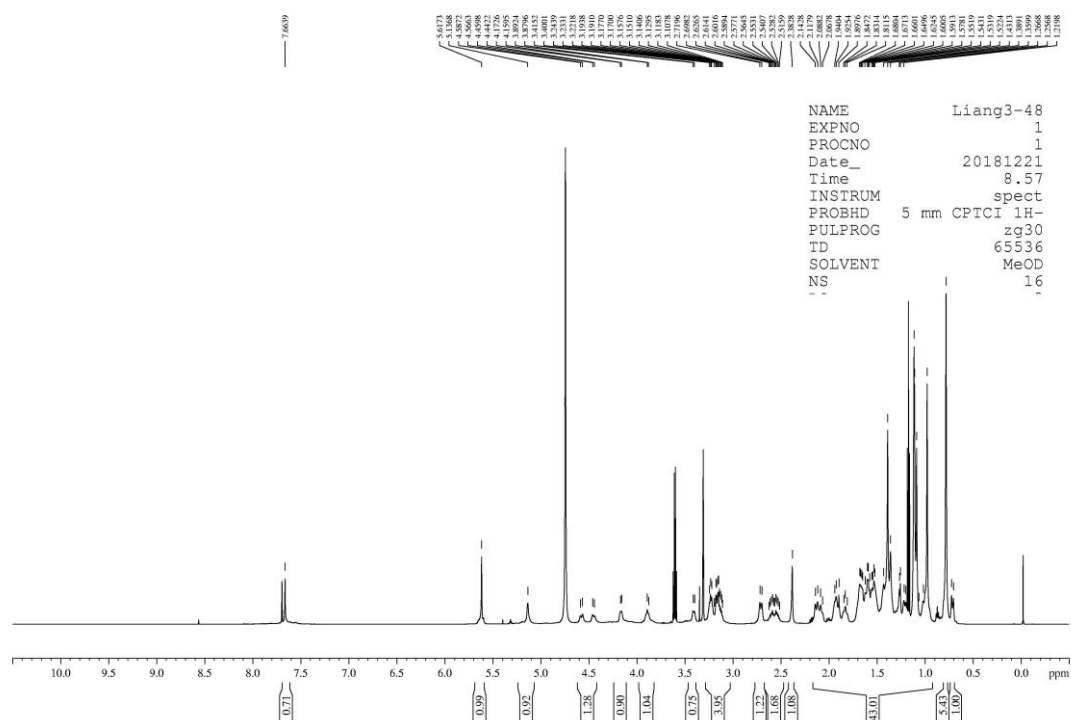

# <sup>13</sup>C NMR of compound **34**

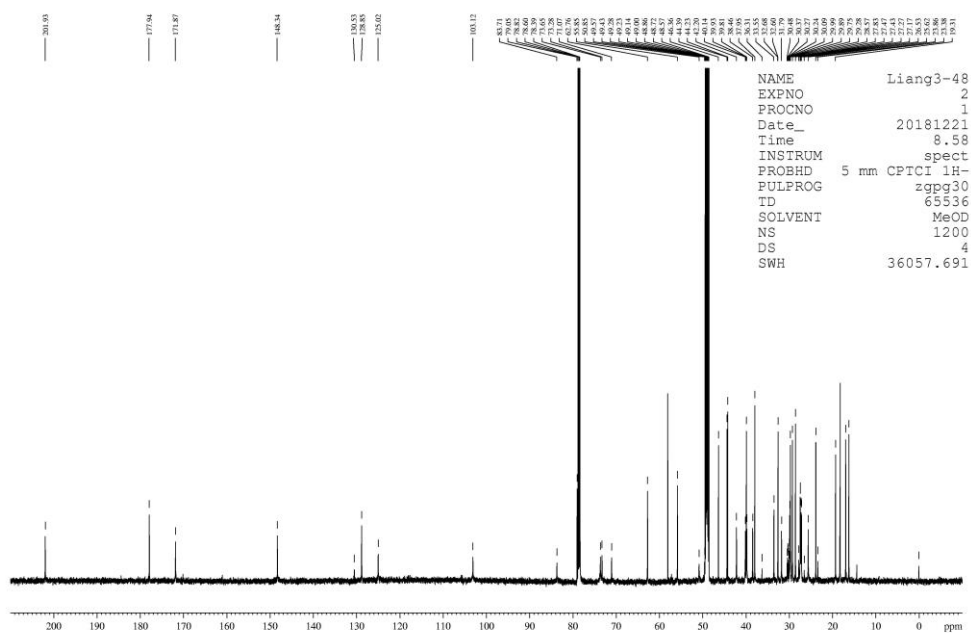



### HSQC of compound **34**

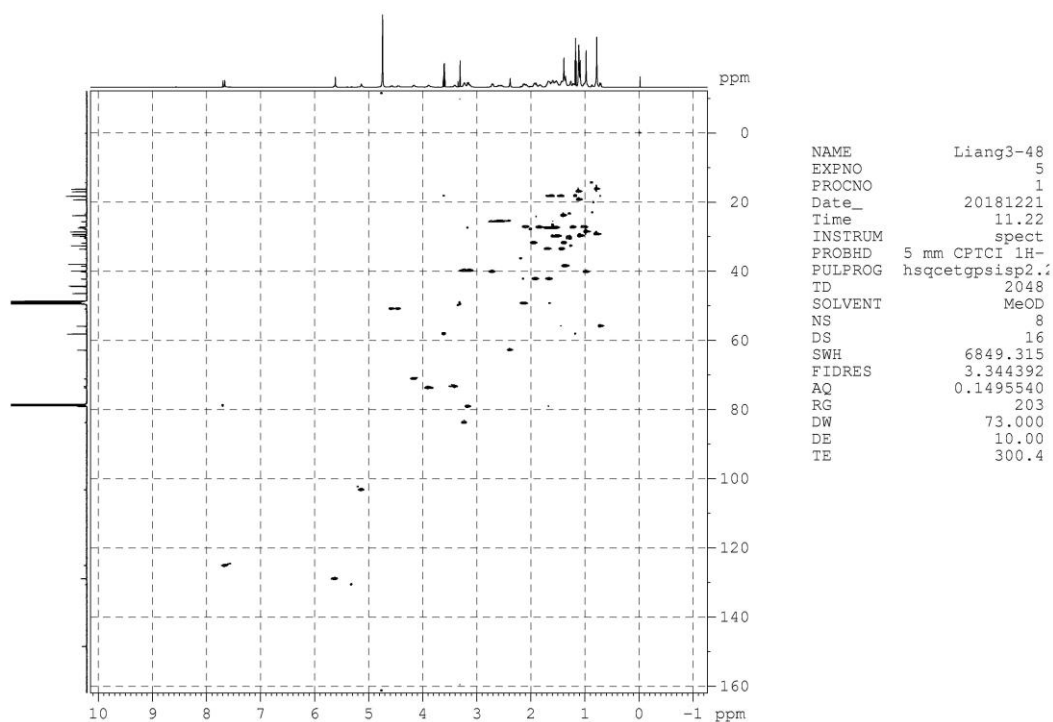

### MALDI-TOF of compound **34**

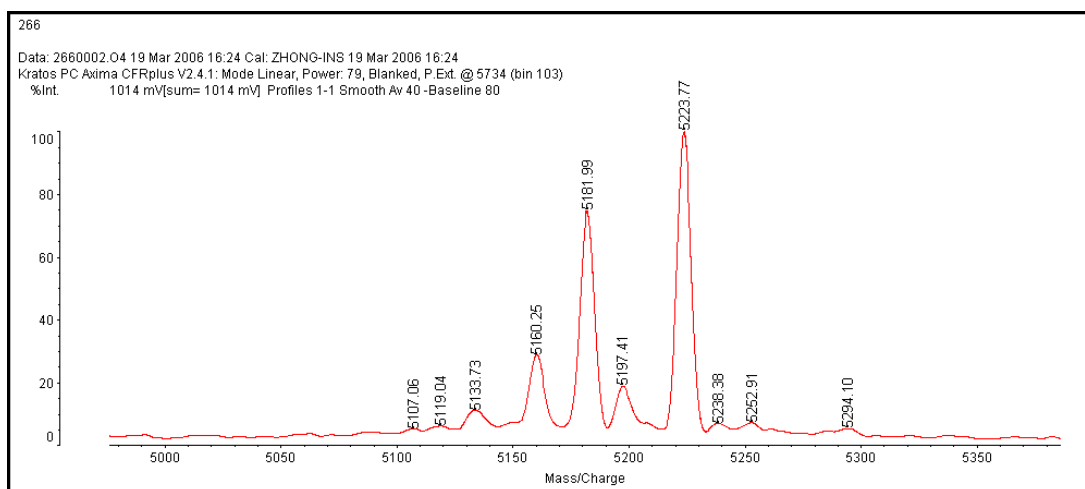

<sup>1</sup>H NMR of compound **35**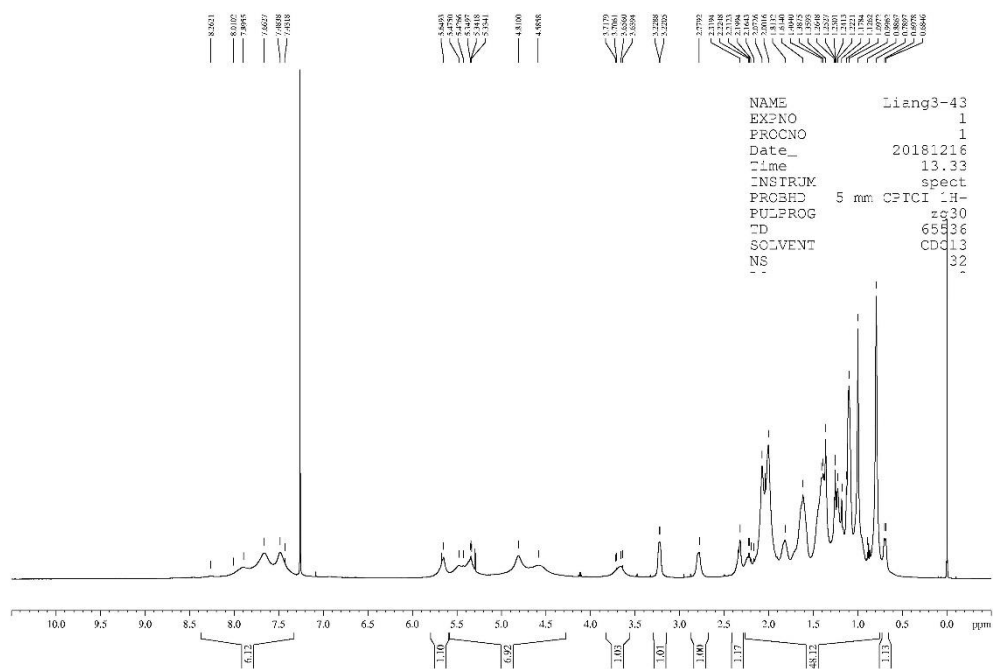 $^{13}\text{C}$  NMR of compound **35**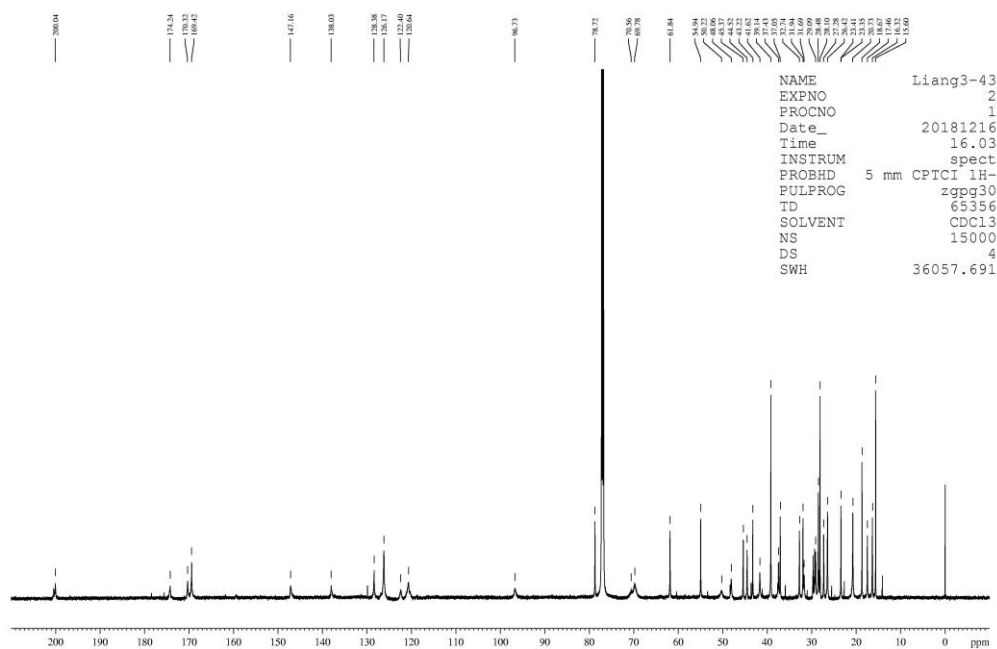

## HSQC of compound 35

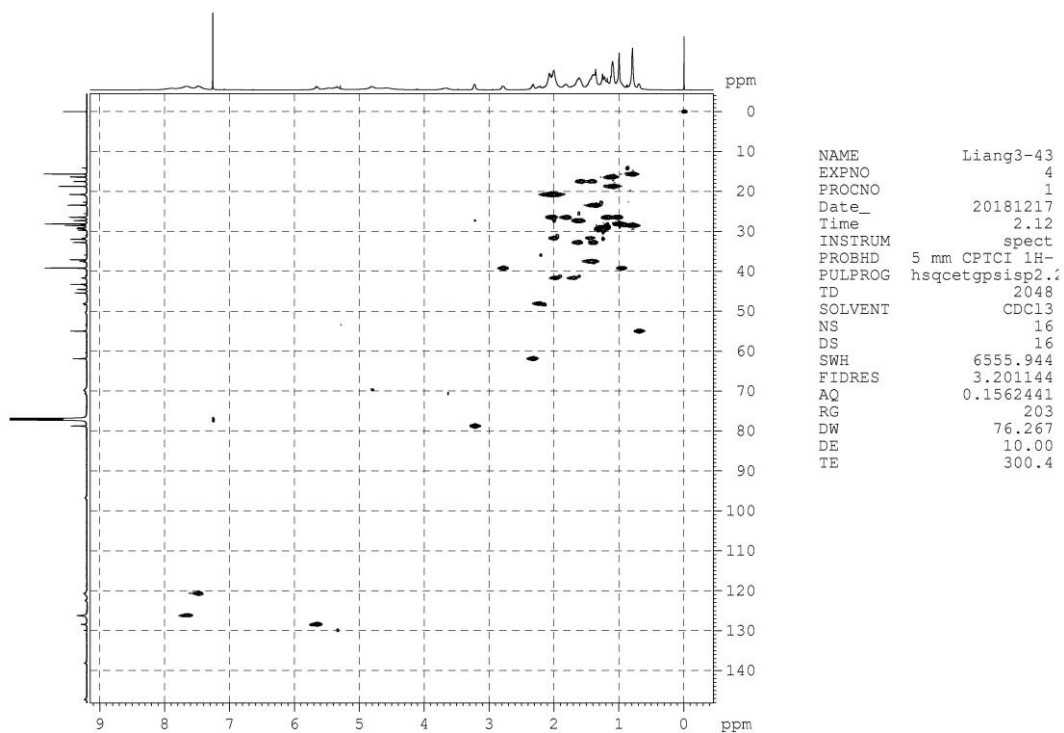

## MALDI-TOF of compound 35

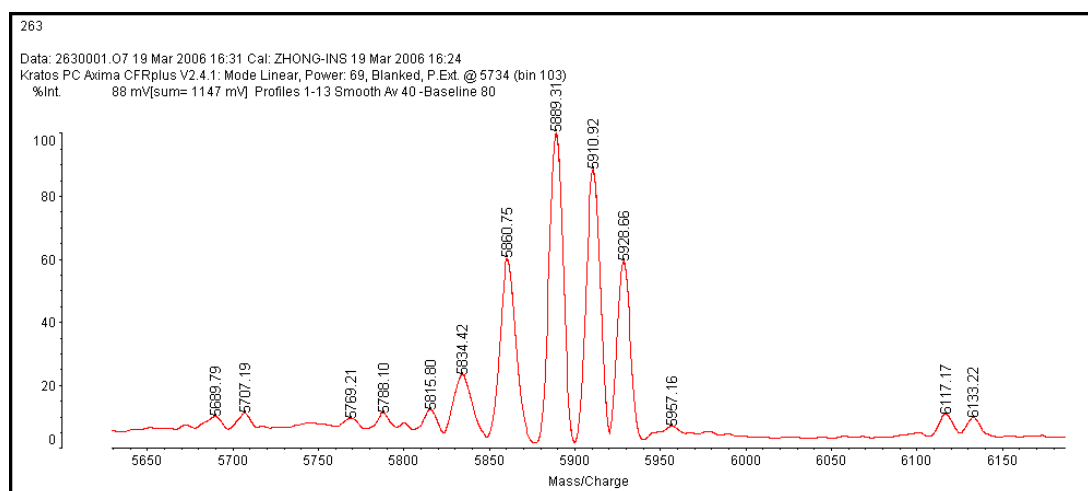

## $^1\text{H}$ NMR of compound 36

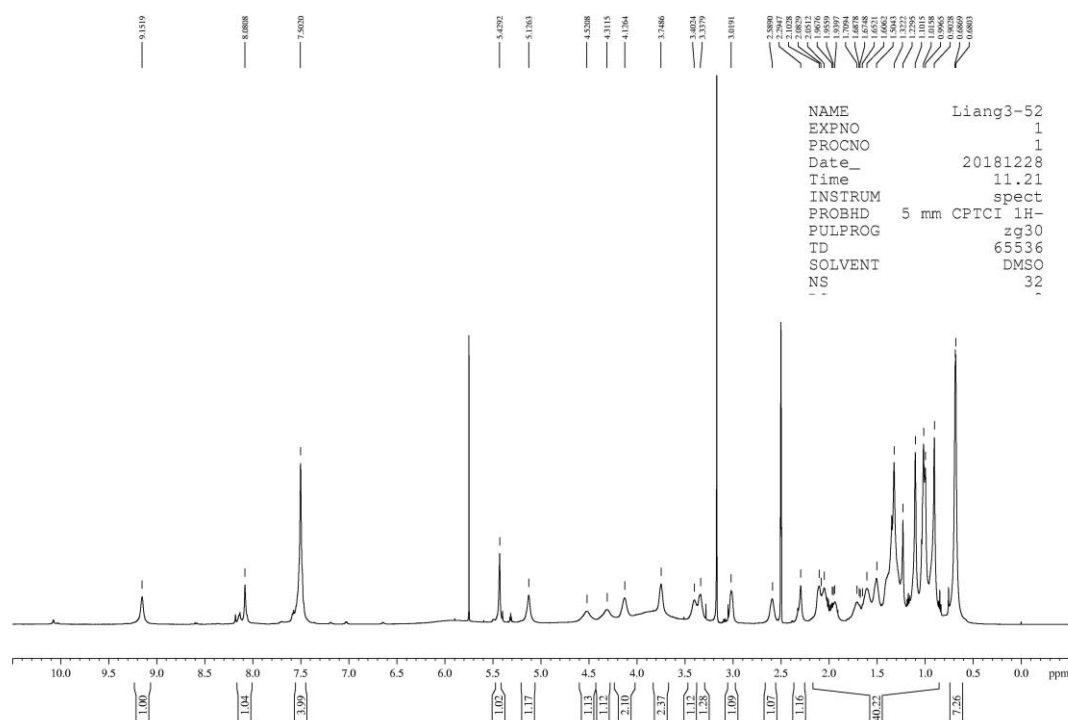

<sup>13</sup>C NMR of compound 36

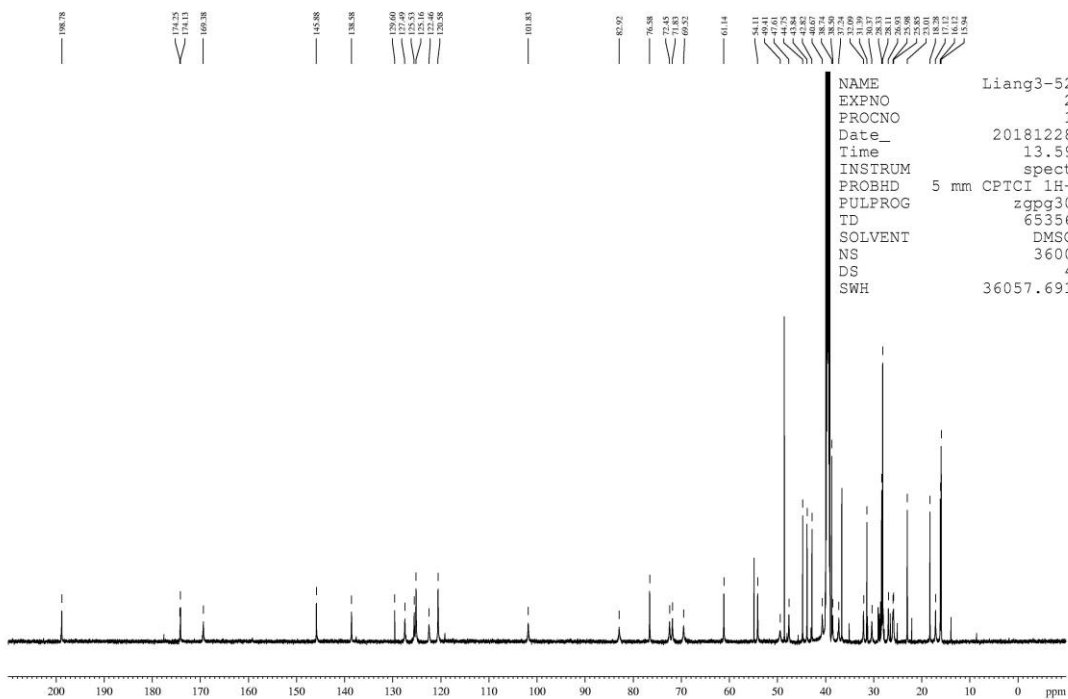

### HSQC of compound **36**

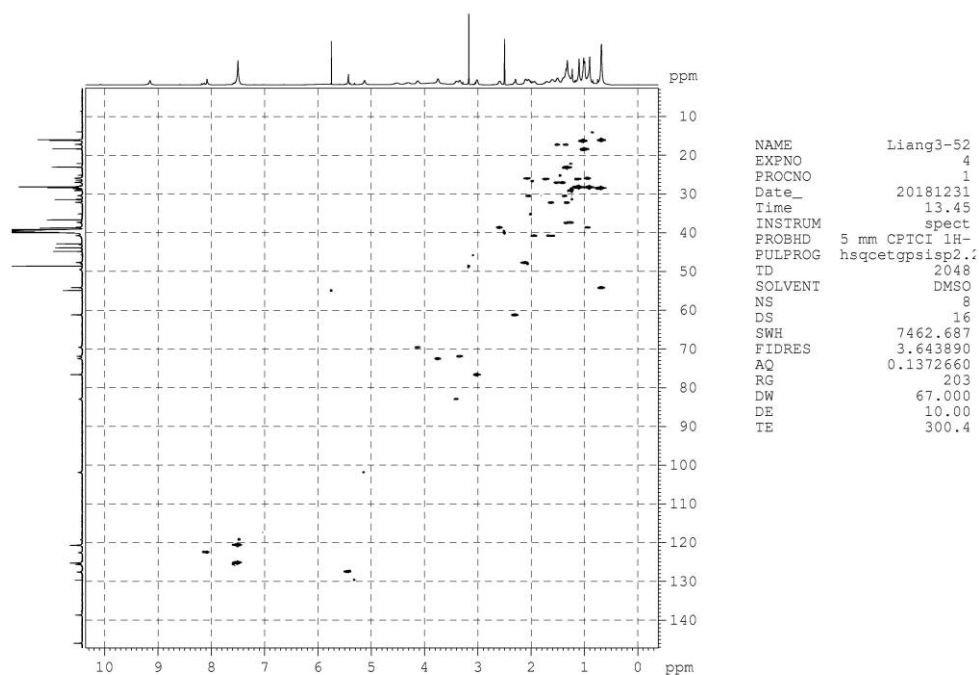

### MALDI-TOF of compound **36**

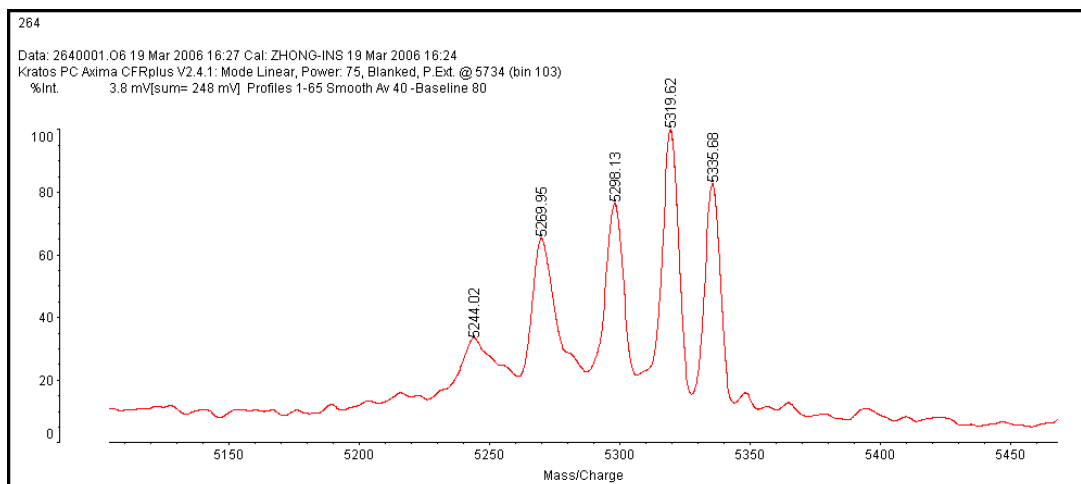

# <sup>1</sup>H NMR of compound **37**

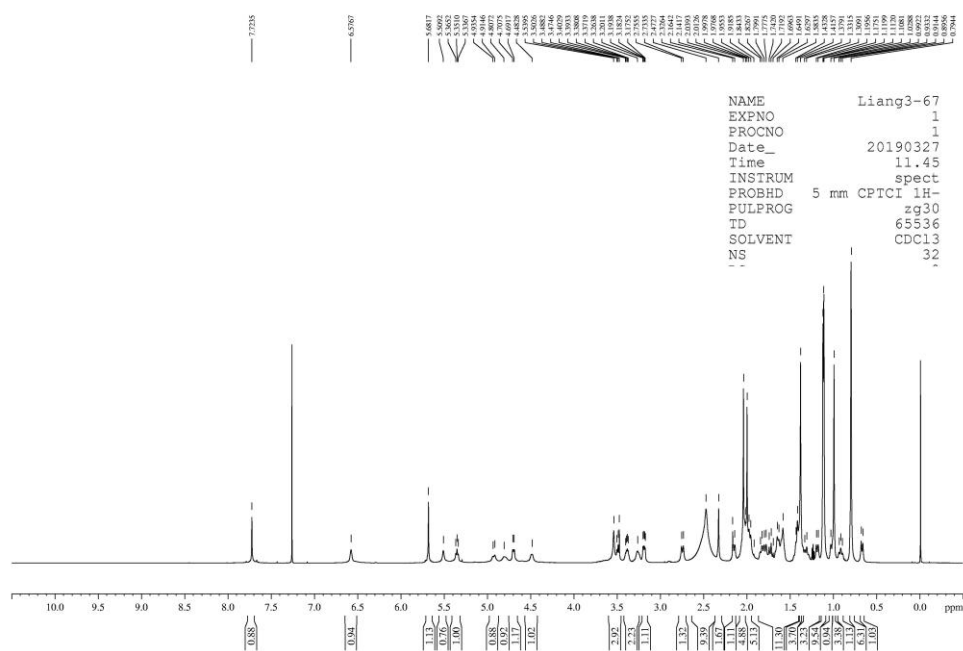

# <sup>13</sup>C NMR of compound **37**

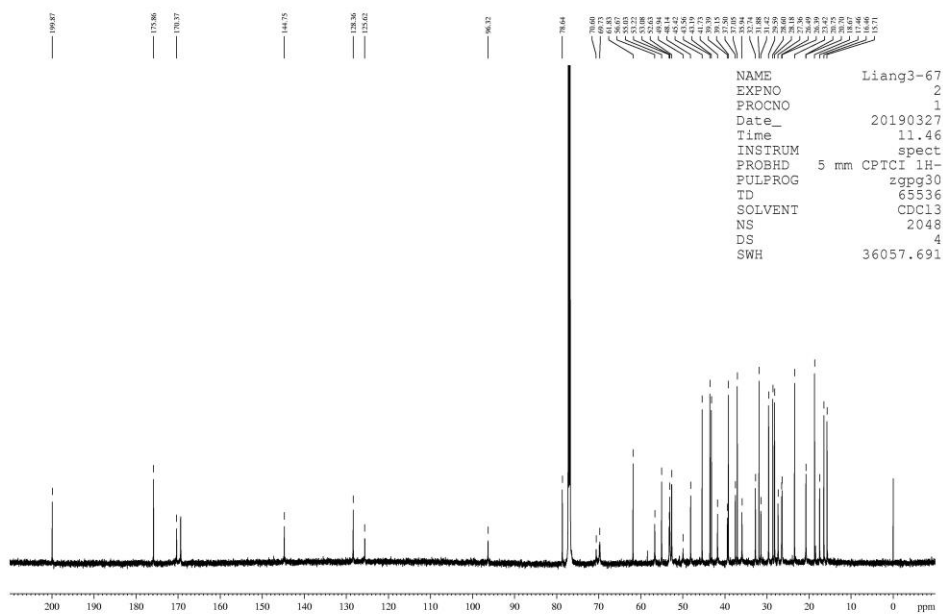

### HSQC of compound 37

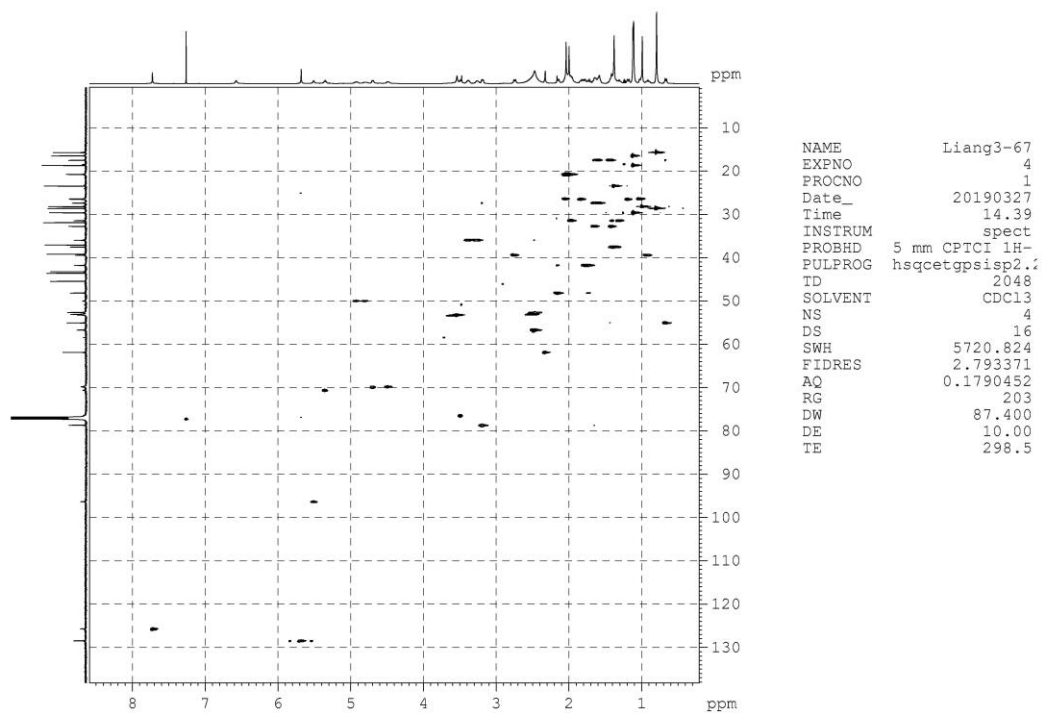

### MALDI-TOF of compound 37

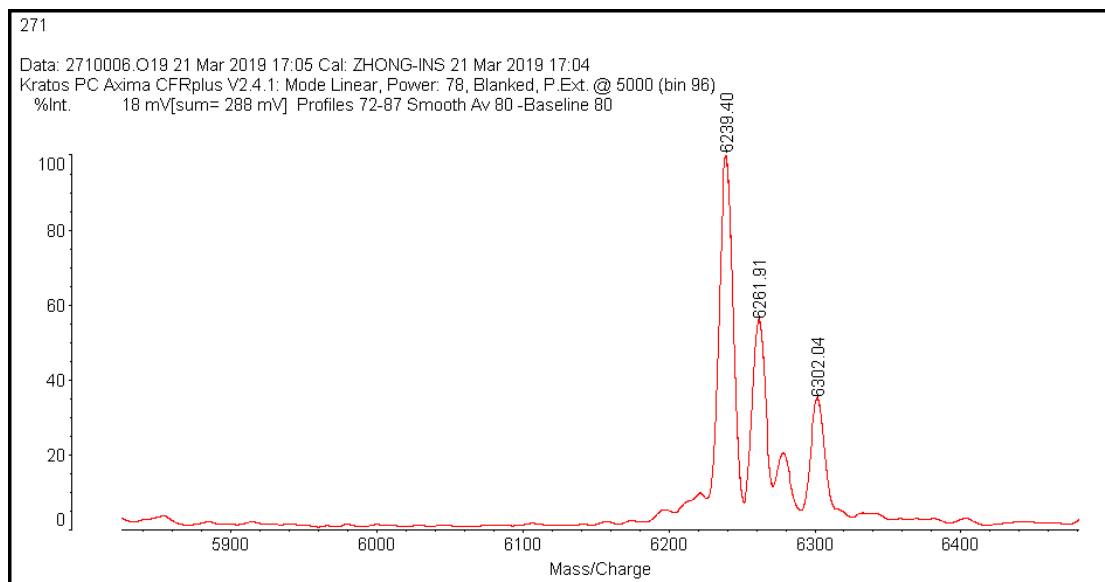

### <sup>1</sup>H NMR of compound **38**

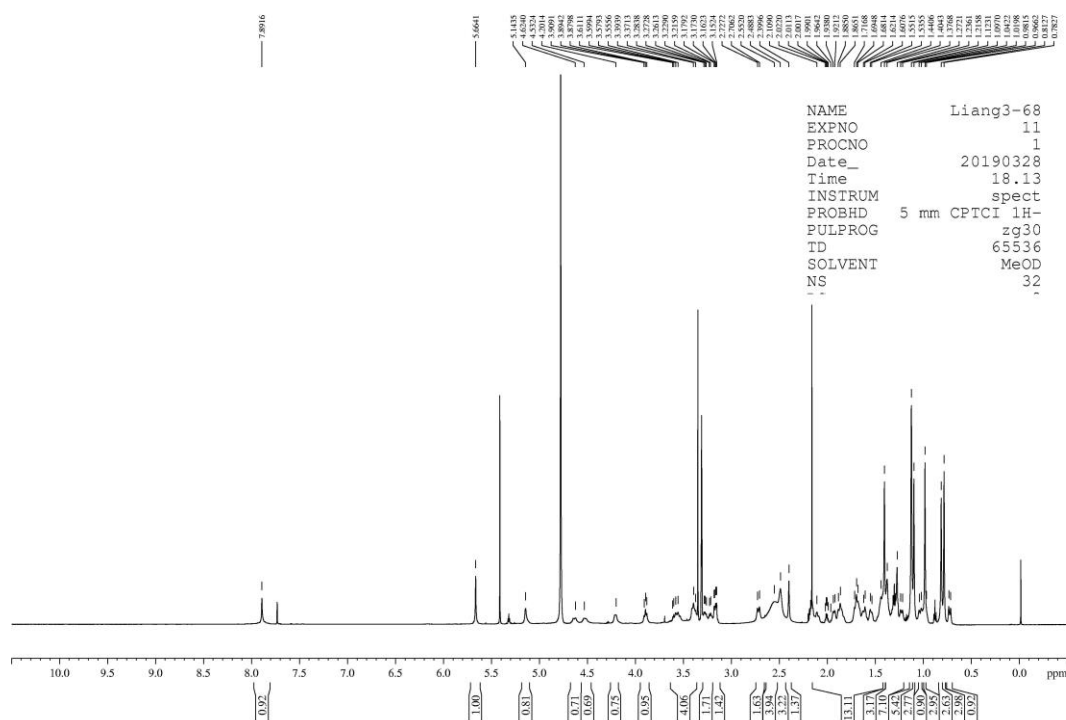 $^{13}\text{C}$  NMR of compound **38**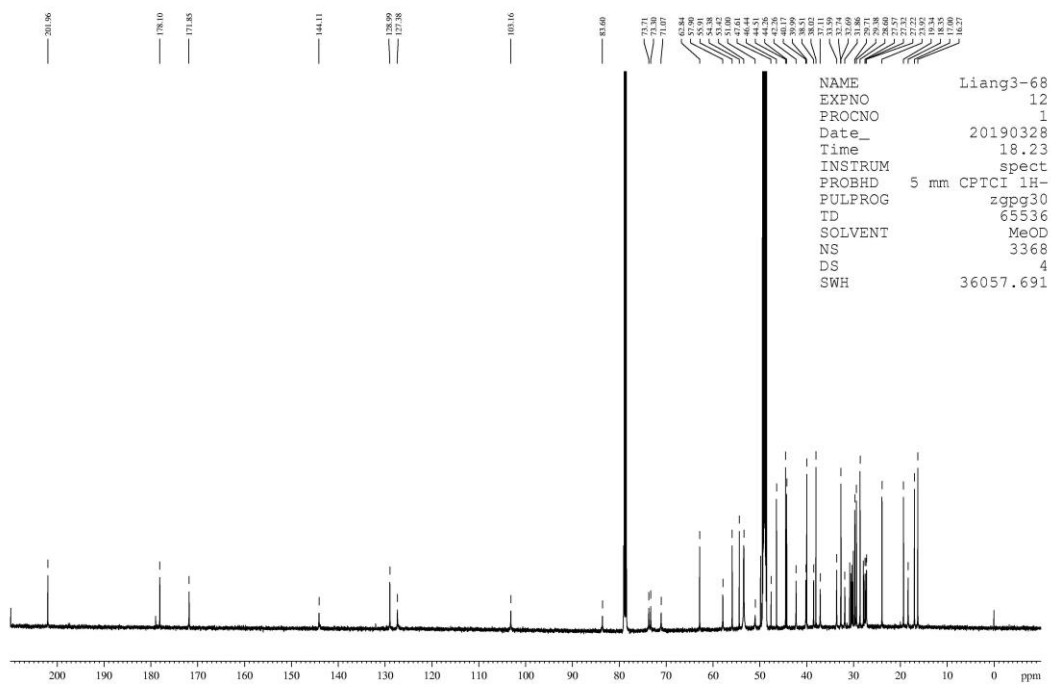



### HSQC of compound **38**

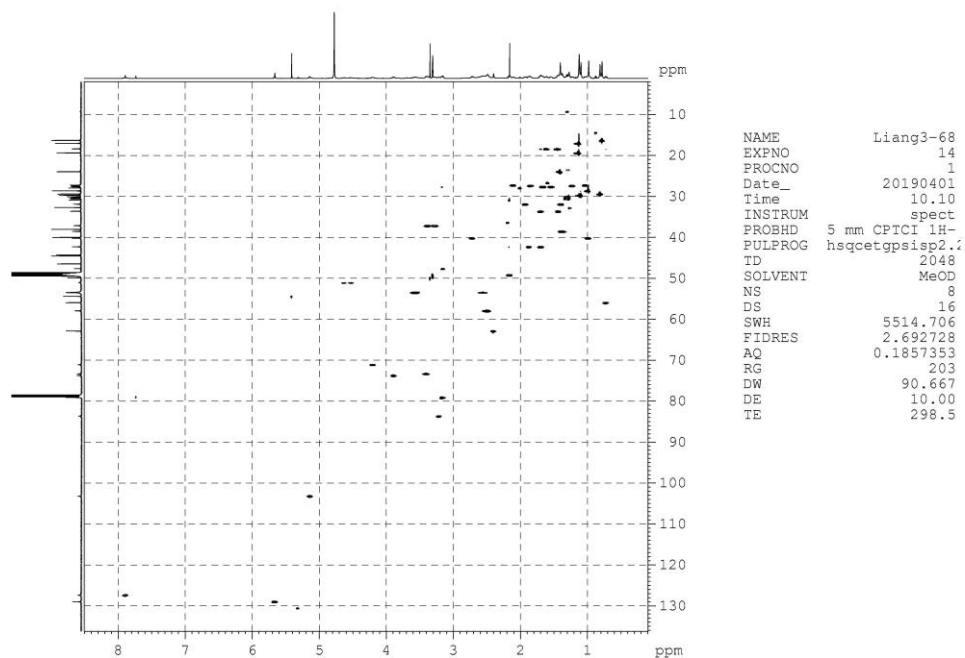

### MALDI-TOF of compound **38**

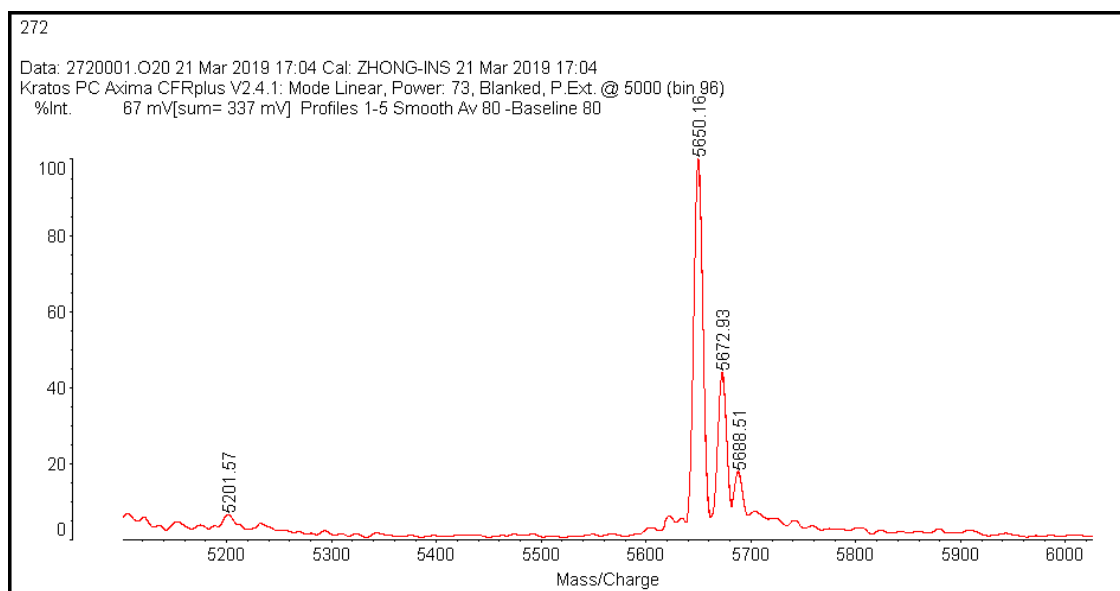

Supplement: Supplementary file [file 34783018]
